# Supplementary material for: Unraveling the Genomic Potential of the Thermophilic Bacterium Anoxybacillus flavithermus from an Antarctic Geothermal Environment
Source: MDPI journal article supplement (doi:10.3390/microorganisms10081673), 2022-08-19
Supplement: s1 [file s1]

# Supplementary Material

## Supplementary Figures

a

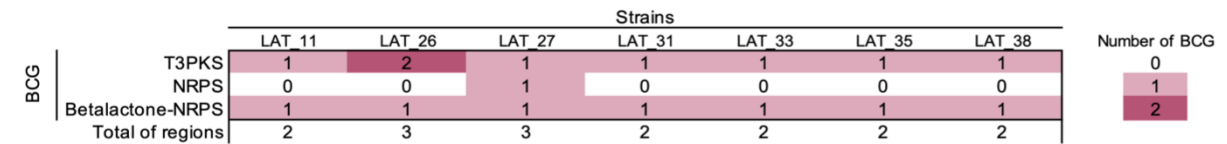

b

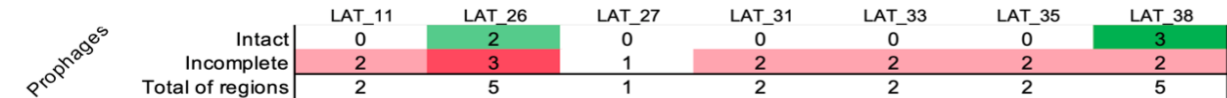

**Figure S1.** a) Biosynthetic gene clusters (BGCs) observed in *Anoxybacillus* strains using antiSMASH 5.0. Blank boxes indicate the absence of BGCs, light pink boxes indicate one BGC, and dark pink boxes indicate two related BGCs. b) Prophages identified in the strains using PHASTER. Green boxes indicate intact prophages, and pink boxes indicate questionable prophages.

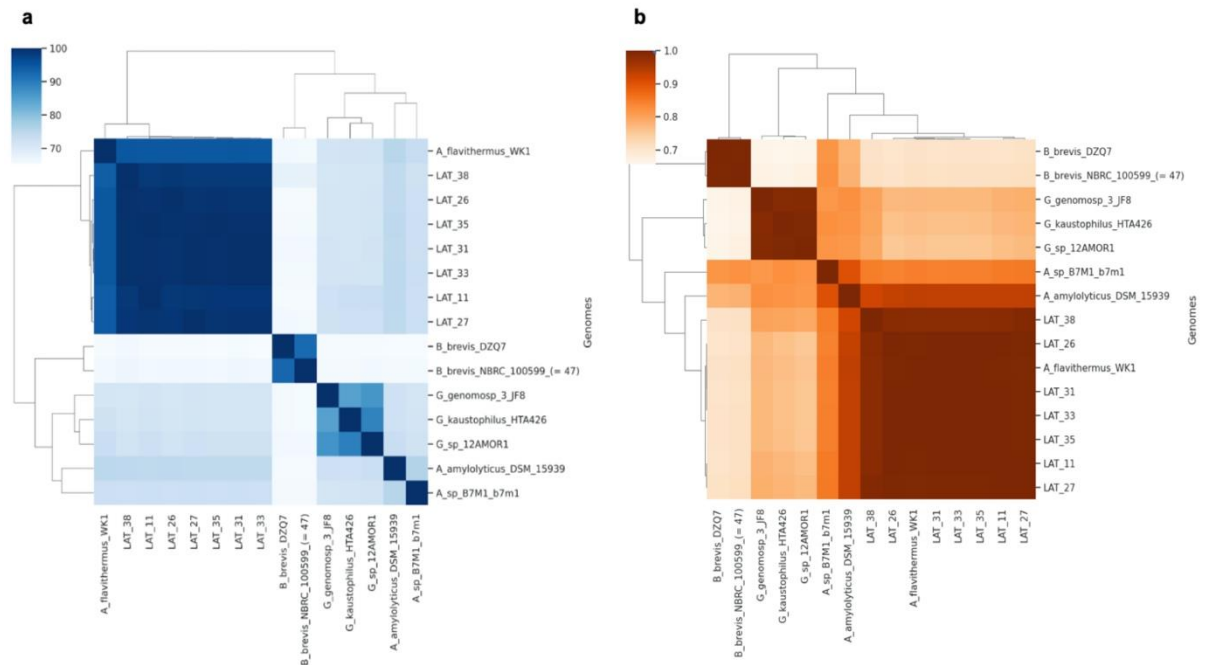

**Figure S2.** Genome comparison of different *Anoxybacillus* strains and Bacillaceae members based on ANI and TETRA values (%). Based on the ANI values, the strains were grouped into two clusters; the Antarctic strains clustered with *A. flavithermus* WK1 (a). The same pattern was observed using TETRA values (b).

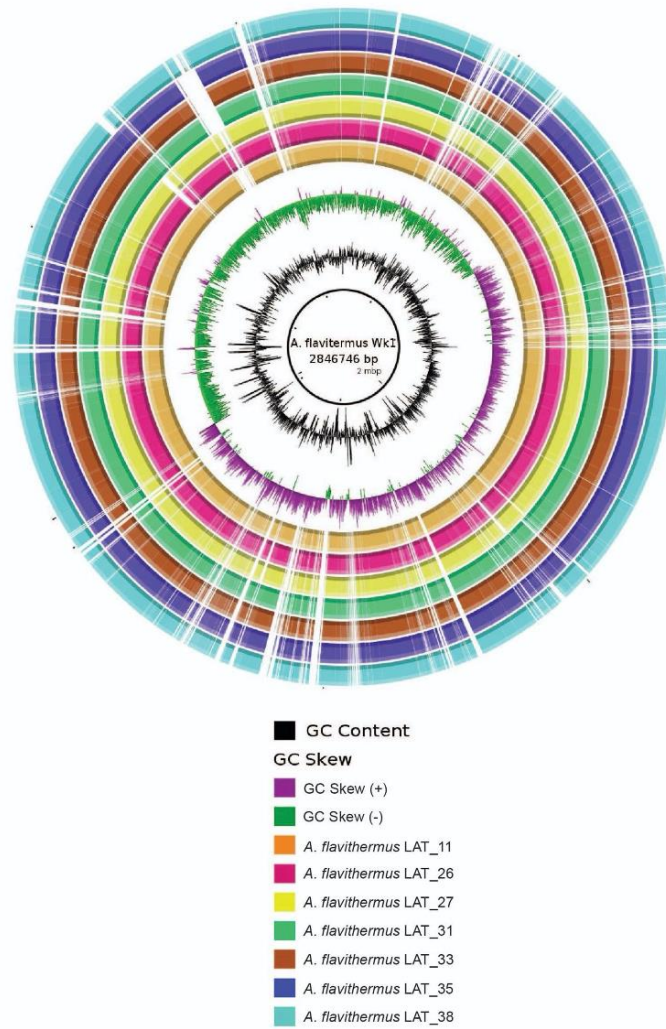

**Figure S3.** Circular visualization generated by BRIG for comparing the genomes of *Anoxybacillus* strains using *A. flavithermus* WK1 (complete genome) as the reference strain. The inner black circle contains the reference genome, and the intensity of each color indicates the similarity between the strains.

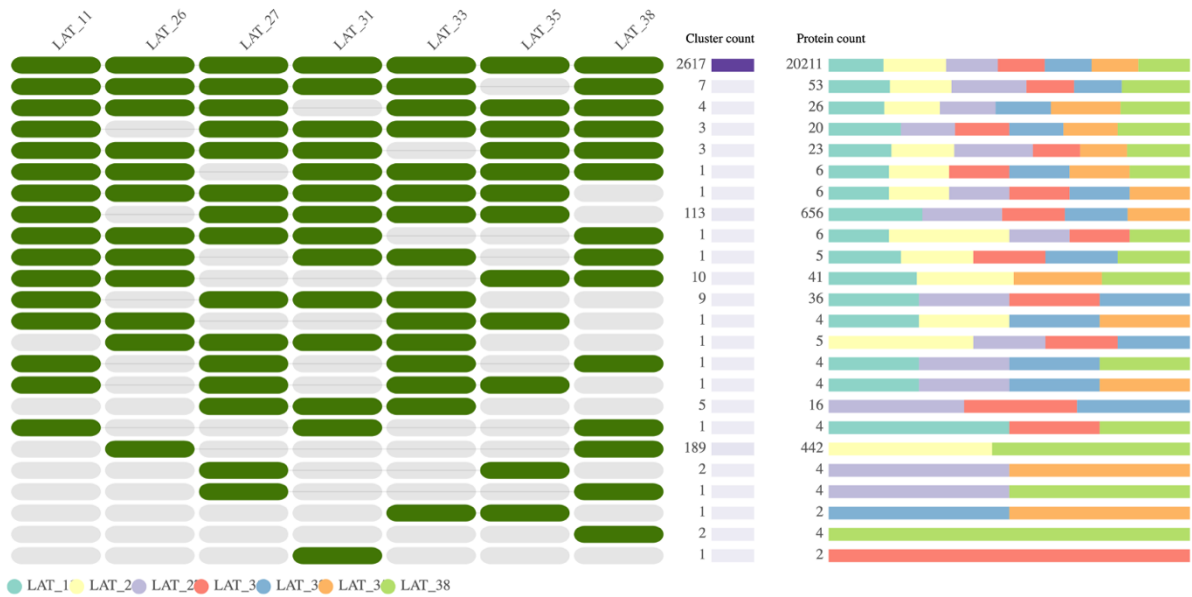

**Figure S4.** Orthologous groups belonging to the seven *Anoxybacillus* strains analyzed in the present study. From left to right: The orthologous groups present in the genomes; dark green color represents the presence of orthologous groups in each strain, while light gray color represents their absence. Number of protein orthologous groups shared in the genomes, marked with dark lilac in the preceding columns “Cluster count.” Total number of proteins (Protein count column) recorded in the shared orthologous groups; the colors represent the proportion of proteins belonging to each strain (light blue = LAT\_11; yellow = LAT\_26; lilac = LAT\_27; red = LAT\_31; blue = LAT\_33; orange = LAT\_35; and green = LAT\_38).

## 2 Supplementary Tables

**Table S1. Published data retrieved from databases used in the systematic review of the genus *Anoxybacillus***

| Authors                                  | Year | Reference                                                                                                                                                                                                                                           | Link                                                                                                                          |
|------------------------------------------|------|-----------------------------------------------------------------------------------------------------------------------------------------------------------------------------------------------------------------------------------------------------|-------------------------------------------------------------------------------------------------------------------------------|
| Acer et al. [82]                         | 2015 | Acer Ö, Bekler FM, Pirinçcioğlu H, Güven RG, Güven K. Purification and Characterization of Thermostable and Detergent-Stable $\alpha$ -Amylase from <i>Anoxybacillus</i> sp. AH1. Food Technol Biotechnol. <b>2016</b> , 54, 70-77.                 | <a href="https://pubmed.ncbi.nlm.nih.gov/27904395/">https://pubmed.ncbi.nlm.nih.gov/27904395/</a> . accessed on 30 June 2021. |
| Al-Kahem Al-Balawi Al-balawi et al. [83] | 2017 | Al-Kahem Al-Balawi TH, Wood AL, Solis A, Cooper T, Barabote RD. <i>Anoxybacillus</i> sp. Strain UARK-01, a New Thermophilic Soil Bacterium with Hyperthermostable Alkaline Laccase Activity. Curr Microbiol. <b>2017</b> , 74, 762-771.             | <a href="https://pubmed.ncbi.nlm.nih.gov/28389772/">https://pubmed.ncbi.nlm.nih.gov/28389772/</a> . accessed on 30 June 2021. |
| Atanassova et al. [84]                   | 2008 | Atanassova M, Derekova A, Mandeva R, Sjöholm C, Kambourova M. <i>Anoxybacillus bogrovensis</i> sp. nov., a novel thermophilic bacterium isolated from a hot spring in Dolni Bogrov, Bulgaria. Int J Syst Evol Microbiol. <b>2008</b> , 58, 2359-62. | <a href="https://pubmed.ncbi.nlm.nih.gov/18842856/">https://pubmed.ncbi.nlm.nih.gov/18842856/</a> . accessed on 30 June 2021. |
| Belduz et al. [85]                       | 2003 | Belduz AO, Dulger S, Demirbag Z. <i>Anoxybacillus gonensis</i> sp. nov., a moderately thermophilic, xylose-utilizing, endospore-forming bacterium. Int J Syst Evol Microbiol. <b>2003</b> , 53, 1315-1320.                                          | <a href="https://pubmed.ncbi.nlm.nih.gov/13130012/">https://pubmed.ncbi.nlm.nih.gov/13130012/</a> . accessed on 30 June 2021. |
| Chai et al. [86]                         | 2001 | Chai YY, Kahar UM, Md Salleh M, Md Illias R, Goh KM. Isolation and characterization of pullulan-degrading <i>Anoxybacillus</i> species isolated from Malaysian hot springs. Environ Technol. <b>2012</b> , 33, 1231-8.                              | <a href="https://pubmed.ncbi.nlm.nih.gov/22856294/">https://pubmed.ncbi.nlm.nih.gov/22856294/</a> . accessed on 30 June 2021. |
| Chan et al. [77]                         | 2016 | Chan CS, Sin LL, Chan KG, Shamsir MS, Manan FA, Sani RK, Goh KM. Characterization of a glucose-tolerant $\beta$ -glucosidase from <i>Anoxybacillus</i> sp. DT3-1. Biotechnol Biofuels. <b>2016</b> , 9, 174.                                        | <a href="https://pubmed.ncbi.nlm.nih.gov/27555880/">https://pubmed.ncbi.nlm.nih.gov/27555880/</a> . accessed on 30 June 2021. |
| Chen et al. [87]                         | 2004 | Chen XG, Stabnikova O, Tay JH, Wang JY, Tay ST. Thermoactive extracellular proteases of <i>Geobacillus caldoproteolyticus</i> , sp. nov., from sewage sludge. Extremophiles. <b>2004</b> , 8, 489-98.                                               | <a href="https://pubmed.ncbi.nlm.nih.gov/15322950/">https://pubmed.ncbi.nlm.nih.gov/15322950/</a> . accessed on 30 June 2021. |
| Chen et al. [88]                         | 2015 | Chen J, Zheng J, Li Y, Hao HH, Chen JM. Characteristics of a novel thermophilic heterotrophic bacterium, <i>Anoxybacillus contaminans</i> HA, for nitrification-aerobic denitrification. Appl Microbiol Biotechnol. <b>2015</b> , 99, 10695-702.    | <a href="https://pubmed.ncbi.nlm.nih.gov/26293335/">https://pubmed.ncbi.nlm.nih.gov/26293335/</a> . accessed on 30 June 2021. |
| Cheng et al. [89]                        | 2021 | Cheng JH, Wang Y, Zhang XY, Sun ML, Zhang X, Song XY, Zhang YZ, Zhang Y, Chen XL. Characterization and Diversity Analysis of the Extracellular Proteases of Thermophilic <i>Anoxybacillus</i>                                                       | <a href="https://pubmed.ncbi.nlm.nih.gov/33796092/">https://pubmed.ncbi.nlm.nih.gov/33796092/</a> . accessed on 30 June 2021. |

|                       |      |                                                                                                                                                                                                                                                                                                                                                                                                                                                                                                                                                                                                                                                                                                                                                                            |                                                                                                                               |
|-----------------------|------|----------------------------------------------------------------------------------------------------------------------------------------------------------------------------------------------------------------------------------------------------------------------------------------------------------------------------------------------------------------------------------------------------------------------------------------------------------------------------------------------------------------------------------------------------------------------------------------------------------------------------------------------------------------------------------------------------------------------------------------------------------------------------|-------------------------------------------------------------------------------------------------------------------------------|
|                       |      | caldiproteolyticus 1A02591 From Deep-Sea Hydrothermal Vent Sediment. <i>Front Microbiol.</i> <b>2021</b> , <i>12</i> , 643508.                                                                                                                                                                                                                                                                                                                                                                                                                                                                                                                                                                                                                                             |                                                                                                                               |
| Cihan et al. [90]     | 2011 | Cihan AC, Ozcan B, Cokmus C. <i>Anoxybacillus salavatliensis</i> sp. nov., an $\alpha$ -glucosidase producing, thermophilic bacterium isolated from Salavatli, Turkey. <i>J Basic Microbiol.</i> 2011 Apr;51(2):136-46.                                                                                                                                                                                                                                                                                                                                                                                                                                                                                                                                                    | <a href="https://pubmed.ncbi.nlm.nih.gov/21077116/">https://pubmed.ncbi.nlm.nih.gov/21077116/</a> . accessed on 30 June 2021. |
| Cihan et al. [91]     | 2014 | Cihan AC, Cokmus C, Koc M, Ozcan B. <i>Anoxybacillus calidus</i> sp. nov., a thermophilic bacterium isolated from soil near a thermal power plant. <i>Int J Syst Evol Microbiol.</i> 2014 Jan;64(Pt 1):211-219. doi: 10.1099/ijs.0.056549-0. Epub 2013 Sep 19. Erratum in: <i>Int J Syst Evol Microbiol.</i> <b>2014</b> , <i>64</i> , 2926. Erratum in: <i>Int J Syst Evol Microbiol.</i> 2014 Jul;64(Pt 7):2508.                                                                                                                                                                                                                                                                                                                                                         | <a href="https://pubmed.ncbi.nlm.nih.gov/24052627/">https://pubmed.ncbi.nlm.nih.gov/24052627/</a> . accessed on 30 June 2021. |
| Clerck et al. [92]    | 2004 | Clerck E, Rodríguez-Díaz M, Vanhoutte T, Heyrman J, Logan NA, De Vos P. <i>Anoxybacillus contaminans</i> sp. nov. and <i>Bacillus gelatini</i> sp. nov., isolated from contaminated gelatin batches. <i>Int J Syst Evol Microbiol.</i> <b>2004</b> , <i>54</i> , 941-946.                                                                                                                                                                                                                                                                                                                                                                                                                                                                                                  | <a href="https://pubmed.ncbi.nlm.nih.gov/15143046/">https://pubmed.ncbi.nlm.nih.gov/15143046/</a> . accessed on 30 June 2021. |
| Coorevits et al. [93] | 2012 | Coorevits A, Dinsdale AE, Halket G, Lebbe L, De Vos P, Van Landschoot A, Logan NA. Taxonomic revision of the genus <i>Geobacillus</i> : emendation of <i>Geobacillus</i> , <i>G. stearothermophilus</i> , <i>G. jurassicus</i> , <i>G. toebii</i> , <i>G. thermodenitrificans</i> and <i>G. thermoglucosidans</i> (nom. corrig., formerly 'thermoglucosidasius'); transfer of <i>Bacillus thermantarcticus</i> to the genus as <i>G. thermantarcticus</i> comb. nov.; proposal of <i>Caldibacillus debilis</i> gen. nov., comb. nov.; transfer of <i>G. tepidamans</i> to <i>Anoxybacillus</i> as <i>A. tepidamans</i> comb. nov.; and proposal of <i>Anoxybacillus caldiproteolyticus</i> sp. nov. <i>Int J Syst Evol Microbiol.</i> <b>2012</b> , <i>62</i> , 1470-1485. | <a href="https://pubmed.ncbi.nlm.nih.gov/21856988/">https://pubmed.ncbi.nlm.nih.gov/21856988/</a> . accessed on 30 June 2021. |
| Deep et al. [94]      | 2013 | Deep K, Poddar A, Das SK. <i>Anoxybacillus suryakundensis</i> sp. nov, a moderately thermophilic, alkalitolerant bacterium isolated from hot spring at Jharkhand, India. <i>PLoS One.</i> <b>2013</b> , <i>8</i> , e85493. doi: 10.1371/journal.pone.0085493. PMID: 24376881; PMCID: PMC3869905.                                                                                                                                                                                                                                                                                                                                                                                                                                                                           | <a href="https://pubmed.ncbi.nlm.nih.gov/24376881/">https://pubmed.ncbi.nlm.nih.gov/24376881/</a> . accessed on 30 June 2021. |
| Derekova et al. [95]  | 2007 | Derekova A, Sjøholm C, Mandeva R, Kambourova M. <i>Anoxybacillus rupiensis</i> sp. Nov., a novel thermophilic bacterium isolated from Rupi basin (Bulgaria). <i>Extremophiles.</i> <b>2007</b> , <i>11</i> , 577-83. doi: 10.1007/s00792-007-0071-4. Epub 2007 May 16. PMID: 17505776.                                                                                                                                                                                                                                                                                                                                                                                                                                                                                     | <a href="https://pubmed.ncbi.nlm.nih.gov/17505776/">https://pubmed.ncbi.nlm.nih.gov/17505776/</a> . accessed on 30 June 2021. |
| Dulger et al. [96]    | 2004 | Dulger S, Demirbag Z, Belduz AO. <i>Anoxybacillus ayderensis</i> sp. nov. and <i>Anoxybacillus kestanbolensis</i> sp. nov. <i>Int J Syst Evol Microbiol.</i> <b>2004</b> , <i>54</i> , 1499-1503. doi: 10.1099/ijs.0.02863-0. PMID: 15388701.                                                                                                                                                                                                                                                                                                                                                                                                                                                                                                                              | <a href="https://pubmed.ncbi.nlm.nih.gov/15388701/">https://pubmed.ncbi.nlm.nih.gov/15388701/</a> . accessed on 30 June 2021. |

|                        |      |                                                                                                                                                                                                                                                                                                                                                                                                                                                               |                                                                                                                                                                                                                                                                                                                                           |
|------------------------|------|---------------------------------------------------------------------------------------------------------------------------------------------------------------------------------------------------------------------------------------------------------------------------------------------------------------------------------------------------------------------------------------------------------------------------------------------------------------|-------------------------------------------------------------------------------------------------------------------------------------------------------------------------------------------------------------------------------------------------------------------------------------------------------------------------------------------|
| Filippidou et al. [97] | 2016 | Filippidou S, Jaussi M, Junier T, Wunderlin T, Jeanneret N, Palmieri F, Palmieri I, Roussel-Delif L, Vieth-Hillebrand A, Vetter A, Chain PS, Regenspurg S, Junier P. <i>Anoxybacillus geothermalis</i> sp. nov., a facultatively anaerobic, endospore-forming bacterium isolated from mineral deposits in a geothermal station. <i>Int J Syst Evol Microbiol.</i> <b>2016</b> , 66, 2944-2951. doi: 10.1099/ijsem.0.001125. Epub 2016 Apr 28. PMID: 27126386. | <a href="https://pubmed.ncbi.nlm.nih.gov/27126386/">https://pubmed.ncbi.nlm.nih.gov/27126386/</a> . accessed on 30 June 2021.                                                                                                                                                                                                             |
| Gao et al. [98]        | 2010 | Gao Y, Dai J, Peng H, Liu Y, Xu T. Isolation and characterization of a novel organic solvent-tolerant <i>Anoxybacillus</i> sp. PGDY12, a thermophilic Gram-positive bacterium. <i>J Appl Microbiol.</i> <b>2011</b> , 110, 472-8. doi: 10.1111/j.1365-2672.2010.04903.x. Epub 2010 Dec 13. PMID: 21155953.                                                                                                                                                    | <a href="https://pubmed.ncbi.nlm.nih.gov/21155953/">https://pubmed.ncbi.nlm.nih.gov/21155953/</a> . accessed on 30 June 2021.                                                                                                                                                                                                             |
| Gul-Guven et al. [99]  | 2008 | Gul-Guven R, Guven K, Poli A, Nicolaus B. <i>Anoxybacillus kamchatkensis</i> subsp. <i>asaccharedens</i> subsp. nov., a thermophilic bacterium isolated from a hot spring in Batman. <i>J Gen Appl Microbiol.</i> <b>2008</b> , 54, 327-34. doi: 10.2323/jgam.54.327. PMID: 19164875.                                                                                                                                                                         | <a href="https://pubmed.ncbi.nlm.nih.gov/19164875/">https://pubmed.ncbi.nlm.nih.gov/19164875/</a> . accessed on 30 June 2021.                                                                                                                                                                                                             |
| Heinen et al. [2]      | 1982 | Heinen W, Lauwers AM, Mulders JW. <i>Bacillus flavothermus</i> , a newly isolated facultative thermophile. <i>Antonie Van Leeuwenhoek.</i> <b>1982</b> , 48, 265-72. doi: 10.1007/BF00400386. PMID: 7125637.                                                                                                                                                                                                                                                  | <a href="https://pubmed.ncbi.nlm.nih.gov/7125637/">https://pubmed.ncbi.nlm.nih.gov/7125637/</a> . accessed on 30 June 2021.                                                                                                                                                                                                               |
| Inan et al. [100]      | 2012 | Inan K, Belduz AO, Canakci S. <i>Anoxybacillus kaynarzensis</i> sp. nov., a moderately thermophilic, xylanase producing bacterium. <i>J Basic Microbiol.</i> <b>2013</b> , 53, 410-9. doi: 10.1007/jobm.201100638. Epub 2012 Jun 26. PMID: 22736500.                                                                                                                                                                                                          | <a href="https://pubmed.ncbi.nlm.nih.gov/22736500/">https://pubmed.ncbi.nlm.nih.gov/22736500/</a> . accessed on 30 June 2021.                                                                                                                                                                                                             |
| Kacagan et al. [101]   | 2008 | Kacagan, Murat & Canakci, Sabriye & Sandalli, Cemal & Inan Bektas, Kadriye & Colak, Dilsat & Belduz, Ali. Characterization of a xylanase from a thermophilic strain of <i>Anoxybacillus pushchinoensis</i> A8. <i>Biologia.</i> <b>2008</b> , 63, doi: 599-606. 10.2478/s11756-008-0134-8.                                                                                                                                                                    | <a href="https://www.researchgate.net/publication/225168883_Characterization_of_a_xylanase_from_a_thermophilic_strain_of_Anoxybacillus_pushchinoensis_A8">https://www.researchgate.net/publication/225168883_Characterization_of_a_xylanase_from_a_thermophilic_strain_of_Anoxybacillus_pushchinoensis_A8</a> . accessed on 30 June 2021. |
| Kevbrin et al. [102]   | 2005 | Kevbrin VV, Zengler K, Lysenko AM, Wiegel J. <i>Anoxybacillus kamchatkensis</i> sp. nov., a novel thermophilic facultative aerobic bacterium with a broad pH optimum from the Geyser valley, Kamchatka. <i>Extremophiles.</i> <b>2005</b> , 9, 391-8. doi: 10.1007/s00792-005-0479-7. Epub 2005 Sep 3. PMID: 16142505.                                                                                                                                        | <a href="https://pubmed.ncbi.nlm.nih.gov/16142505/">https://pubmed.ncbi.nlm.nih.gov/16142505/</a> . accessed on 30 June 2021.                                                                                                                                                                                                             |
| Khan et al. [103]      | 2018 | Khan IU, Habib N, Xiao M, Devi AM, Habib M, Hejazi MS, Salam N, Zhi XY, Li WJ. <i>Anoxybacillus sediminis</i> sp. nov., a novel moderately thermophilic bacterium isolated from a hot spring. <i>Antonie Van Leeuwenhoek.</i> <b>2018</b> , 111, 2275-2282. doi: 10.1007/s10482-018-1118-5. Epub 2018 Jun 21. PMID: 29931494.                                                                                                                                 | <a href="https://pubmed.ncbi.nlm.nih.gov/29931494/">https://pubmed.ncbi.nlm.nih.gov/29931494/</a> . accessed on 30 June 2021.                                                                                                                                                                                                             |

|                             |      |                                                                                                                                                                                                                                                                                                                                                                   |                                                                                                                                                                                                                                                                                                                                                                                                                                                                         |
|-----------------------------|------|-------------------------------------------------------------------------------------------------------------------------------------------------------------------------------------------------------------------------------------------------------------------------------------------------------------------------------------------------------------------|-------------------------------------------------------------------------------------------------------------------------------------------------------------------------------------------------------------------------------------------------------------------------------------------------------------------------------------------------------------------------------------------------------------------------------------------------------------------------|
| Khanna et al. [104]         | 2021 | Khanna K, Mishra KP, Chanda S, Ganju L, Singh SB, Kumar B. Effect of Synbiotics on Amelioration of Intestinal Inflammation Under Hypobaric Hypoxia. <i>High Alt Med Biol.</i> <b>2021</b> , 22, 32-44.                                                                                                                                                            | <a href="https://www.liebertpub.com/doi/10.1089/ham.2020.0062?url_ver=Z39.88-2003&amp;rfr_id=ori:rid:crossref.org&amp;rfr_dat=cr_pub%20%20pubmed">https://www.liebertpub.com/doi/10.1089/ham.2020.0062?url_ver=Z39.88-2003&amp;rfr_id=ori:rid:crossref.org&amp;rfr_dat=cr_pub%20%20pubmed</a> . accessed on 30 June 2021.                                                                                                                                               |
| Lee et al. [105]            | 2012 | Lee, Sang-Jae & Lee, Yong-Jik & Ryu, Naeun & Park, Seulki & Jeong, Haeyoung & Lee, Sang Jun & Kim, Byoung-Chan & Lee, Dong-Woo & Lee, Han-Seung. Draft Genome Sequence of the Thermophilic Bacterium <i>Anoxybacillus kamchatkensis</i> G10. <i>Journal of bacteriology.</i> <b>2012</b> , 194, 6684-5. 10.1128/JB.01877-12.                                      | <a href="https://www.researchgate.net/publication/233396557_Draft_Genome_Sequence_of_the_Thermophilic_Bacterium_Anoxybacillus_kamchatkensis_G10">https://www.researchgate.net/publication/233396557_Draft_Genome_Sequence_of_the_Thermophilic_Bacterium_Anoxybacillus_kamchatkensis_G10</a> . accessed on 30 June 2021.                                                                                                                                                 |
| Matpan-Bekler e Güven [106] | 2014 | Matpan-Bekler, Fatma & Guven, Kemal. (2014). Isolation and production of thermostable $\alpha$ -amylase from thermophilic <i>Anoxybacillus</i> sp. KP1 from Diyadin hot spring in Ağrı, Turkey. <i>Biologia.</i> <b>2014</b> , 69, 419-427.                                                                                                                       | <a href="https://www.researchgate.net/publication/260450268_Isolation_and_production_of_thermostable_alpha-amylase_from_thermophilic_Anoxybacillus_sp_KP1_from_Diyadin_hot_spring_in_Agri_Turkey">https://www.researchgate.net/publication/260450268_Isolation_and_production_of_thermostable_alpha-amylase_from_thermophilic_Anoxybacillus_sp_KP1_from_Diyadin_hot_spring_in_Agri_Turkey</a> . accessed on 30 June 2021.                                               |
| Matpan-Bekler et al. [107]  | 2018 | Matpan-Bekler, Fatma & Yalaz, Secil & Guven, Kemal. Molecular characterisation and numerical analysis of novel moderately thermophile <i>Anoxybacillus</i> sp. FMB1. <i>Romanian Biotechnological Letters.</i> <b>2018</b> , 23,13964-13975.                                                                                                                      | <a href="https://www.researchgate.net/publication/326416833_Molecular_characterisation_and_numerical_analysis_of_novel_moderately_thermophile_Anoxybacillus_sp_FMB1">https://www.researchgate.net/publication/326416833_Molecular_characterisation_and_numerical_analysis_of_novel_moderately_thermophile_Anoxybacillus_sp_FMB1</a> . accessed on 30 June 2021.                                                                                                         |
| Mittal at el. [108]         | 2017 | Mittal, Parul & Saxena, Rituja & Sharma, Vineet. Draft Genome Sequence of <i>Anoxybacillus mongoliensis</i> Strain MB4, a Sulfur-Utilizing Aerobic Thermophile Isolated from a Hot Spring in Tattapani, Central India. <i>Genome Announcements.</i> <b>2017</b> , 5, e01709-16. 10.1128/genomeA.01709-16.                                                         | <a href="https://www.researchgate.net/publication/314190462_Draft_Genome_Sequence_of_Anoxybacillus_mongoliensis_Strain_MB4_a_Sulfur-Utilizing_Aerobic_Thermophile_Isolated_from_a_Hot_Spring_in_Tattapani_Central_India">https://www.researchgate.net/publication/314190462_Draft_Genome_Sequence_of_Anoxybacillus_mongoliensis_Strain_MB4_a_Sulfur-Utilizing_Aerobic_Thermophile_Isolated_from_a_Hot_Spring_in_Tattapani_Central_India</a> . accessed on 30 June 2021. |
| Najar et al. [109]          | 2018 | Najar IN, Sherpa MT, Das S, Das S, Thakur N. Microbial ecology of two hot springs of Sikkim: Predominate population and geochemistry. <i>Science of the Total Environment</i> <b>2018</b> , 637-638, 730-745.                                                                                                                                                     | <a href="https://www.sciencedirect.com/science/article/pii/S0048969718316693">https://www.sciencedirect.com/science/article/pii/S0048969718316693</a> . accessed on 30 June 2021.                                                                                                                                                                                                                                                                                       |
| Namsaraev et al. [110]      | 2010 | Namsaraev ZB, Babasanova OB, Dunaevsky YE, Akimov VN, Barkhutova DD, Gorlenko VM, Namsaraev BB. <i>Anoxybacillus mongoliensis</i> sp. nov., a novel thermophilic proteinase producing bacterium isolated from alkaline hot spring, central Mongolia. <i>Mikrobiologiya.</i> <b>2010</b> , 79, 516-23. PMID: 21058505.                                             | <a href="https://pubmed.ncbi.nlm.nih.gov/21058505/">https://pubmed.ncbi.nlm.nih.gov/21058505/</a> . accessed on 30 June 2021.                                                                                                                                                                                                                                                                                                                                           |
| Ottesen et al. [111]        | 2016 | Ottesen A, Ramachandran P, Reed E, White JR, Hasan N, Subramanian P, Ryan G, Jarvis K, Grim C, Daquigan N, Hanes D, Allard M, Colwell R, Brown E, Chen Y. Enrichment dynamics of <i>Listeria monocytogenes</i> and the associated microbiome from naturally contaminated ice cream linked to a listeriosis outbreak. <i>BMC Microbiol.</i> <b>2016</b> , 16, 275. | <a href="https://bmcmicrobiol.biomedcentral.com/articles/10.1186/s12866-016-0894-1">https://bmcmicrobiol.biomedcentral.com/articles/10.1186/s12866-016-0894-1</a> . accessed on 30 June 2021.                                                                                                                                                                                                                                                                           |

|                         |      |                                                                                                                                                                                                                                                                                                                                                                   |                                                                                                                                                                                                         |
|-------------------------|------|-------------------------------------------------------------------------------------------------------------------------------------------------------------------------------------------------------------------------------------------------------------------------------------------------------------------------------------------------------------------|---------------------------------------------------------------------------------------------------------------------------------------------------------------------------------------------------------|
| Patel [112]             | 2015 | Patel BK. Draft Genome Sequence of Anoxybacillus Strain BCO1, Isolated from a Thermophilic Microbial Mat Colonizing the Outflow of a Bore Well of the Great Artesian Basin of Australia. <i>Genome Announc.</i> <b>2015</b> , 3, e01547-14. doi: 10.1128/genomeA.01547-14.                                                                                        | <a href="https://pubmed.ncbi.nlm.nih.gov/25676761/">https://pubmed.ncbi.nlm.nih.gov/25676761/</a> . accessed on 30 June 2021.                                                                           |
| Pikuta et al. [1]       | 2000 | Pikuta E, Lysenko A, Chuvilskaya N, Mendrock U, Hippe H, Suzina N, Nikitin D, Osipov G, Laurinavichius K. Anoxybacillus pushchinensis gen. nov., sp. nov., a novel anaerobic, alkaliphilic, moderately thermophilic bacterium from manure, and description of Anoxybacillus flavitherms comb. nov. <i>Int J Syst Evol Microbiol.</i> <b>2000</b> , 50, 2109-2117. | <a href="https://pubmed.ncbi.nlm.nih.gov/11155986/">https://pubmed.ncbi.nlm.nih.gov/11155986/</a> . accessed on 30 June 2021.                                                                           |
| Poli et al. [10]        | 2006 | Poli A, Esposito E, Lama L, Orlando P, Nicolaus G, de Appolonia F, Gambacorta A, Nicolaus B. Anoxybacillus amylolyticus sp. nov., a thermophilic amylase producing bacterium isolated from Mount Rittmann (Antarctica). <i>Syst Appl Microbiol.</i> <b>2006</b> , 29, 300-7.                                                                                      | <a href="https://pubmed.ncbi.nlm.nih.gov/16682297/">https://pubmed.ncbi.nlm.nih.gov/16682297/</a> . accessed on 30 June 2021.                                                                           |
| Poli et al. [60]        | 2009 | Poli A, Romano I, Cordella P, Orlando P, Nicolaus B, Ceschi Berrini C. Anoxybacillus thermarum sp. nov., a novel thermophilic bacterium isolated from thermal mud in Euganean hot springs, Abano Terme, Italy. <i>Extremophiles.</i> <b>2009</b> , 13, 867-74.                                                                                                    | <a href="https://pubmed.ncbi.nlm.nih.gov/19710998/">https://pubmed.ncbi.nlm.nih.gov/19710998/</a> . accessed on 30 June 2021.                                                                           |
| Reis et al. [113]       | 2020 | Reis SVD, Beys-da-Silva WO, Tirloni L, Santi L, Seixas A, Termignoni C, Silva MVD, Macedo AJ. The extremophile Anoxybacillus sp. PC2 isolated from Brazilian semiarid region (Caatinga) produces a thermostable keratinase. <i>J Basic Microbiol.</i> <b>2020</b> , 60, 809-815.                                                                                  | <a href="https://pubmed.ncbi.nlm.nih.gov/32602226/">https://pubmed.ncbi.nlm.nih.gov/32602226/</a> . accessed on 30 June 2021.                                                                           |
| Sahm et al. [114]       | 2013 | Sahm K, John P, Nacke H, Wemheuer B, Grote R, Daniel R, Antranikian G. High abundance of heterotrophic prokaryotes in hydrothermal springs of the Azores as revealed by a network of 16S rRNA gene-based methods. <i>Extremophiles.</i> <b>2013</b> , 17, 649-62.                                                                                                 | <a href="https://link.springer.com/article/10.1007/s00792-013-0548-2">https://link.springer.com/article/10.1007/s00792-013-0548-2</a> . accessed on 30 June 2021.                                       |
| Salam and Obayori [115] | 2020 | Salam LB, Obayori OS. Remarkable shift in structural and functional properties of an animal charcoal-polluted soil accentuated by inorganic nutrient amendment. <i>J Genet Eng Biotechnol.</i> <b>2020</b> , 18, 70.                                                                                                                                              | <a href="https://www.ncbi.nlm.nih.gov/pmc/articles/PMC7658278/">https://www.ncbi.nlm.nih.gov/pmc/articles/PMC7658278/</a> . accessed on 30 June 2021.                                                   |
| Wu et al. [116]         | 2012 | Wu S, Wang G, Angert ER, Wang W, Li W, Zou H. Composition, diversity, and origin of the bacterial community in grass carp intestine. <i>PLoS One.</i> <b>2012</b> , 7, e30440.                                                                                                                                                                                    | <a href="https://journals.plos.org/plosone/article?id=10.1371/journal.pone.0030440">https://journals.plos.org/plosone/article?id=10.1371/journal.pone.0030440</a> . accessed on 30 June 2021.           |
| Xia et al. [117]        | 2015 | Xia, Wenjie and Dong, Hao and Zheng, Chenggang and Cui, Qingfeng and He, Panqing and Tang, Yongchun. Hydrocarbon degradation by a newly isolated thermophilic Anoxybacillus sp. with bioemulsifier production and new alkB genes. <i>RSC Adv.</i> <b>2015</b> , 5, 102367-102377. The Royal Society of Chemistry.                                                 | <a href="https://pubs.rsc.org/en/content/articlelanding/2015/ra/c5ra17137g#!divAbstract">https://pubs.rsc.org/en/content/articlelanding/2015/ra/c5ra17137g#!divAbstract</a> . accessed on 30 June 2021. |



|                     |      |                                                                                                                                                                                                                                                                                                              |                                                                                                                                                                                 |
|---------------------|------|--------------------------------------------------------------------------------------------------------------------------------------------------------------------------------------------------------------------------------------------------------------------------------------------------------------|---------------------------------------------------------------------------------------------------------------------------------------------------------------------------------|
| Yadav et al. [118]  | 2018 | Yadav P, Maharjan J, Korpole S, Prasad GS, Sahni G, Bhattarai T and Sreerama L. Production, Purification, and Characterization of Thermostable Alkaline Xylanase From <i>Anoxybacillus kamchatkensis</i> NASTPD13. <i>Front. Bioeng. Biotechnol.</i> <b>2018</b> , 6, 65.                                    | <a href="https://www.frontiersin.org/articles/10.3389/fbioe.2018.00065/full">https://www.frontiersin.org/articles/10.3389/fbioe.2018.00065/full</a> . accessed on 30 June 2021. |
| Yumoto et al. [119] | 2004 | Yumoto I, Hirota K, Kawahara T, Nodasaka Y, Okuyama H, Matsuyama H, Yokota Y, Nakajima K, Hoshino T. <i>Anoxybacillus voinovskiensis</i> sp. nov., a moderately thermophilic bacterium from a hot spring in Kamchatka. <i>Int J Syst Evol Microbiol.</i> <b>2004</b> , 54, 1239-1242.                        | <a href="https://pubmed.ncbi.nlm.nih.gov/15280298/">https://pubmed.ncbi.nlm.nih.gov/15280298/</a> . accessed on 30 June 2021.                                                   |
| Zhang et al. [120]  | 2011 | Zhang CM, Huang XW, Pan WZ, Zhang J, Wei KB, Klenk HP, Tang SK, Li WJ, Zhang KQ. <i>Anoxybacillus tengchongensis</i> sp. nov. and <i>Anoxybacillus eryuanensis</i> sp. nov., facultatively anaerobic, alkalitolerant bacteria from hot springs. <i>Int J Syst Evol Microbiol.</i> <b>2011</b> , 61, 118-122. | <a href="https://pubmed.ncbi.nlm.nih.gov/20173008/">https://pubmed.ncbi.nlm.nih.gov/20173008/</a> . accessed on 30 June 2021.                                                   |
| Zhang et al. [121]  | 2013 | Zhang XQ, Zhang ZL, Wu N, Zhu XF, Wu M. <i>Anoxybacillus vitaminiphilus</i> sp. nov., a strictly aerobic and moderately thermophilic bacterium isolated from a hot spring. <i>Int J Syst Evol Microbiol.</i> <b>2013</b> , 63, 4064-4071.                                                                    | <a href="https://pubmed.ncbi.nlm.nih.gov/23728374/">https://pubmed.ncbi.nlm.nih.gov/23728374/</a> . accessed on 30 June 2021.                                                   |
| Zhao et al. [122]   | 2017 | Zhao C, Chu Y, Li Y, Yang C, Chen Y, Wang X, Liu B. High-throughput pyrosequencing used for the discovery of a novel cellulase from a thermophilic cellulose-degrading microbial consortium. <i>Biotechnol Lett.</i> <b>2017</b> , 39, 123-131.                                                              | <a href="https://link.springer.com/article/10.1007/s10529-016-2224-y">https://link.springer.com/article/10.1007/s10529-016-2224-y</a> . accessed on 30 June 2021.               |

**Table S2. List of described species of the genus *Anoxybacillus* and their characteristics (identification, isolation, and growth)**

| Reference           | Species                           | Location                  | Source                  | Substrate         | Culture medium                                                                                                                                                                                                                                                                                                                                                                | Growth condition* | Temperature range | Optimal temperature | pH range | Optimal pH | Genome size | %GC    | Accession number |
|---------------------|-----------------------------------|---------------------------|-------------------------|-------------------|-------------------------------------------------------------------------------------------------------------------------------------------------------------------------------------------------------------------------------------------------------------------------------------------------------------------------------------------------------------------------------|-------------------|-------------------|---------------------|----------|------------|-------------|--------|------------------|
| Pikuta et al. [1]   | <i>A. pushchinoensis</i> K1       | Moscow, Russia            | Fertilizer samples      | Manure samples    | Anaerobic basal medium with yeast extract and glucose as carbon source, added after sterilization                                                                                                                                                                                                                                                                             | An/F. a           | 37–66°C           | 62°C                | 8.0–10.5 | 9.5–9.7    | -           | 42.20% | NR_037100        |
| Heinen et al. [2]   | <i>A. flavithermus</i>            | North Island, New Zealand | Hot spring              | Rock surface grit | Bouillon agar with 5% casein                                                                                                                                                                                                                                                                                                                                                  | F. a              | 30–72°C           | 60–65°C             | 5.5–9.0  | 7.0        | -           | 61%    | -                |
| Belduz et al. [85]  | <i>A. gonensis</i> G2             | Balikesir, Turkey         | Hot spring              | Mud and water     | Nutrient broth for enrichment                                                                                                                                                                                                                                                                                                                                                 | F. an             | 40–70°C           | 55–60°C             | 6.0–10.0 | 7.5–8.0    | -           | 57%    | NR_025667        |
| Dulger et al. [96]  | <i>A. ayderensis</i> AB4          | Rize, Turkey              | Hot spring              | Water             | Nutrient broth for enrichment                                                                                                                                                                                                                                                                                                                                                 | F. an             | 40–70°C           | 50°C                | 6.0–11.0 | 7.5–8.5    | -           | 54%    | AF001963         |
| Chen et al. [88]    | <i>A. caldiproteolyticus</i> SF03 | Seletar, Singapore        | Sewage sludge samples   | Sewage sludge     | Nutrient broth agar, tryptic soy agar, and plate count agar                                                                                                                                                                                                                                                                                                                   | A                 | 35–65°C           | 60°C                | 6.0–9.0  | 6.5        | -           | -      | AY327448         |
| Clerck et al. [92]  | <i>A. contaminans</i> LMG21881    | France                    | French production plant | Gelatin samples   | Nutrient agar supplemented with 1–2% gelatin                                                                                                                                                                                                                                                                                                                                  | F. an             | 50–60°C           | 50°C                | 4.0–10.0 | 7.0        | -           | 44.40% | NR_029006.1      |
| Dulger et al. [96]  | <i>A. kestanbolensis</i> K4       | Çanakkale, Turkey         | Hot spring              | Water             | Nutrient broth for enrichment                                                                                                                                                                                                                                                                                                                                                 | F. an             | 40–70°C           | 50–55°C             | 6.0–10.5 | 7.5–8.5    | -           | 50%    | AY248711         |
| Yumoto et al. [119] | <i>A. voinovskiensis</i> TH3      | Kamchatka, Russia         | Hot spring              | Water             | TH agar medium, containing 5 g peptone, 3 g yeast extract, 5 g NaCl, 15 g agar, 3.5 mg EDTA, 3 mg ZnSO <sub>4</sub> ·7H <sub>2</sub> O, 10 mg FeSO <sub>4</sub> ·7H <sub>2</sub> O, 2 mg MnSO <sub>4</sub> ·nH <sub>2</sub> O, 1 mg CuSO <sub>4</sub> ·5H <sub>2</sub> O, 2 mg Co(NO <sub>3</sub> ) <sub>2</sub> ·6H <sub>2</sub> O and 1 mg H <sub>3</sub> BO <sub>3</sub> . | F. a              | 30–64°C           | 54°C                | 7.0–8.0  | ND         | -           | 43.90% | AB110008         |

|                        |                                                         |                                   |                                     |                 |                                                                                                                                                                                                                                                                                  |       |         |         |          |         |   |        |            |
|------------------------|---------------------------------------------------------|-----------------------------------|-------------------------------------|-----------------|----------------------------------------------------------------------------------------------------------------------------------------------------------------------------------------------------------------------------------------------------------------------------------|-------|---------|---------|----------|---------|---|--------|------------|
| Kevbrin et al. [102]   | <i>A. kamchatkensis</i> JW/VK-KG4T                      | Kamchatka, Russia                 | Hot spring of the Valley of Geysers | Water sediment  | Anaerobic mineral bicarbonate buffered medium                                                                                                                                                                                                                                    | F. a  | 38–67°C | 57–62°C | 5.7–9.9  | 6.8–8.5 | - | 42.30% | AF510985   |
| Poli et al. [10]       | <i>A. amylolyticus</i> MR3C                             | Rittmann Mount, Antarctica        | Geothermal soil                     | Geothermal soil | Enrichment media (A) containing Oxoid yeast extract (varying from 0.3% to 0.6%) and NaCl (0.3–0.6%) at pH 5.6 and pH 4.0                                                                                                                                                         | F. an | 45–65°C | 61°C    | 5.0–6.5  | 5.6     | - | 43.50% | AJ618979   |
| Derekova et al. [95]   | <i>A. rupienses</i> DSM 17127T                          | Rupi Basin, Bulgaria              | Hot spring                          | Water and soil  | PY medium (pH 7.0) containing peptone, 2 g l <sup>-1</sup> and yeast extract, 1 g l <sup>-1</sup>                                                                                                                                                                                | A     | 35–67°C | 55°C    | 5.5–8.5  | 6.0–6.5 | - | 41.70% | AJ879076   |
| Atanassova et al. [84] | <i>A. bogrovensis</i> BT-13                             | Sofia, Bulgaria                   | Hot spring                          | Mud             | PY medium (pH 7.0) containing (g l <sup>-1</sup> ): peptone, 2 and yeast extract, 1<br>Plated on PY agar (pH 7.0)                                                                                                                                                                | F. an | 40–69°C | 65°C    | 6.5–10.0 | 8.0     | - | 44.10% | AM409184.1 |
| Gul-Guven et al. [99]  | <i>A. kamchatkensis</i> subsp. <i>asaccharedens</i> KG8 | Batman, Turkey                    | Hot spring                          | Mud             | Medium (C) nutrient broth                                                                                                                                                                                                                                                        | A     | 35–65°C | 55°C    | 5.5–9.5  | 7.5     | - | -      | AM999779   |
| Kacagan et al. [101]   | <i>A. pushchinoensis</i> A8                             | Turkey                            | Hot spring                          | Mud and water   | Nutrient agar                                                                                                                                                                                                                                                                    | F. an | 50–60°C | 55°C    | 6.5–11.0 | 6.5     | - | -      | AY248715   |
| Poli et al. [60]       | <i>A. thermarum</i> AF/04                               | Padova, Italy                     | Hot spring                          | Thermal mud     | Enrichment media (A) containing (% values are in w/v): peptone, 0.8%; yeast extract, 0.4%; and NaCl 0.2%                                                                                                                                                                         | A     | 55–67°C | 65°C    | 6.0–7.5  | 7.2     | - | 53.50% | AM402982   |
| Namsaraev et al. [110] | <i>A. mongoliensis</i> T4                               | Arkhangai Aimag, Central Mongolia | Hot spring                          | Water sediment  | Aerobic medium containing (g l <sup>-1</sup> ): KH <sub>2</sub> PO <sub>4</sub> , 0.5; NH <sub>4</sub> Cl, 0.5; KCl, 0.5; NaCl, 0.5; Na <sub>2</sub> SO <sub>4</sub> , 0.5; MgSO <sub>4</sub> ·7H <sub>2</sub> O, 0.2; yeast extract, 1; peptone, 1; and glucose, 5; in addition | F. an | 35–70°C | 60°C    | 5.5–10.5 | 8.0     | - | 44%    | EF654664   |

|                       |                                      |                       |                         |                             |                                                                                          |       |         |      |          |         |              |        |              |
|-----------------------|--------------------------------------|-----------------------|-------------------------|-----------------------------|------------------------------------------------------------------------------------------|-------|---------|------|----------|---------|--------------|--------|--------------|
|                       |                                      |                       |                         |                             | to trace element solution, 1 ml                                                          |       |         |      |          |         |              |        |              |
| Cihan et al. [90]     | <i>A. salavatliensis</i> A343        | Aydin, Turkey         | Well pipeline sediment  | Sediment                    | <i>Geobacillus thermoglucosidasius</i> medium (MI) containing 1% soluble starch (pH 7.0) | F. an | 37–69°C | 60°C | 5.5–9.5  | 8.0–9.0 | -            | 45.10% | EU326496     |
| Gao et al. [98]       | <i>Anoxybacillus</i> sp. PGDY12      | Yunnan, China         | Hot spring              | Water sediment              | LB medium supplemented with 0.05% toluene                                                | A     | 65°C    | 55°C | 5.0–10.0 | 7.0     | -            | -      | FJ527829     |
| Zhang et al. [120]    | <i>A. eryuanensis</i> E-112          | Yunnan, China         | Hot spring              | Water                       | LB medium                                                                                | F. a  | 30–70°C | 55°C | 7.0–11.0 | 8.0     | -            | 42.60% | GQ153549     |
| Chai et al. [86]      | <i>Anoxybacillus</i> sp. SK3-4       | Sungai Klah, Malaysia | Hot spring              | Water                       | Modified <i>Thermus</i> medium                                                           | A/An  | 30–65°C | 55°C | 6.0–10.0 | 7.0     | -            | 42%    | GQ184213     |
| Zhang et al. [120]    | <i>A. tengchongensis</i> T-11        | Yunnan, China         | Hot spring              | Water                       | LB medium                                                                                | F. a  | 30–75°C | 50°C | 7.0–11.0 | 8.5     | -            | 41.10% | FJ438370     |
| Coorevits et al. [95] | <i>A. caldiproteolyticus</i> R-35652 | Singapore             | Water reclamation plant | Sewage sludge               | TSA                                                                                      | A     | 37–70°C | 60°C | 5.0–9.0  | 6.5–7.0 | -            | 40.20% | NR_116989    |
| Lee et al. [107]      | <i>A. kamchatkensis</i> G10          | Indonesia             | Hot spring              | -                           | -                                                                                        | F. an | -       | -    | -        | -       | 2,962,568 bp | 41.35% | ALJT01000000 |
| Inan et al. [102]     | <i>A. kaynarcensis</i> D1021         | Izmir, Turkey         | Hot spring              | Water and mud               | Nutrient broth for enrichment                                                            | A     | 35–70°C | 60°C | 6.0–10.0 | 7.0     | -            | 42.90% | DSM 21706    |
| Coorevits et al. [93] | <i>A. tepidamans</i> R-35643         | Austria               | Factory                 | Sugar beet extraction juice | TSA                                                                                      | F. an | 40–65°C | 55°C | 6.0–9.0  | 5.0     | -            | 43.20% | AY563003     |
| Deep et al. [94]      | <i>A. suryakundensis</i> JS1         | Jharkhand, India      | Hot spring              | Sediment                    | TSA                                                                                      | F. an | 40–60°C | 55°C | 5.5–11.5 | 7.5     | -            | 42.10% | KC958552     |

|                               |                               |                                |                            |                            |                                                                                                                                                                                   |       |         |         |          |          |             |        |              |
|-------------------------------|-------------------------------|--------------------------------|----------------------------|----------------------------|-----------------------------------------------------------------------------------------------------------------------------------------------------------------------------------|-------|---------|---------|----------|----------|-------------|--------|--------------|
| Zhang et al. [120]            | <i>A. vitaminiphilus</i> 3nP4 | Sichuan, China                 | Hot spring                 | Water                      | Modified Brock medium, consisting of tryptone (3.0 g l <sup>-1</sup> ), yeast extract (3.0 g l <sup>-1</sup> ), and basic mineral medium                                          | A     | 38–66°C | 57–60°C | 6.0–9.3  | 7.0–7.5  | -           | 39.20% | FJ474084     |
| Cihan et al. [91]             | <i>A. calidus</i> C161ab      | Denizli, Aegean Region, Turkey | Thermal power plant        | Soil                       | <i>Geobacillus thermoglucosidasius</i> medium (MI) containing 1% soluble starch (pH 7.0)                                                                                          | F. an | 35–70°C | 55°C    | 6.5–9.0  | 8.0–8.5  | -           | 37.80% | FJ430012     |
| Matpan-Bekler and Guven [106] | <i>Anoxybacillus</i> sp. KP1  | Ağrı, Turkey                   | Hot spring                 | Mud and water              | Nutrient broth medium                                                                                                                                                             | A     | 40–65°C | 60°C    | 6.5–9.5  | 8.0      | -           | -      | KC525949     |
| Chen et al. [87]              | <i>A. contaminans</i> HA      | China                          | BioDeNOx treatment system  | -                          | Modified denitrification medium (MDM)                                                                                                                                             | A     | 30–60°C | 55°C    | -        | -        | -           | -      | KF973318     |
| Patel [112]                   | <i>Anoxybacillus</i> sp. BC01 | Australia                      | Great Artesian Basin (GAB) | Microbial mat colonization | Medium D                                                                                                                                                                          | F. an | -       | 50°C    | -        | 7.5      | 2.8 Mb      | 41.70% | JRLC01000000 |
| Xia et al. [117]              | <i>Anoxybacillus</i> sp. WJ-4 | Longhu Pao                     | Daqing Oil Field           | Brine and oil              | Minimal medium supplemented with crude oil                                                                                                                                        | F. a  | 45–80°C | 68–72°C | -        | 6.0–8.0  | -           | 44.30% | KR153283     |
| Filippidou et al. [97]        | <i>A. geothermalis</i> GSsed3 | North Germany                  | Soil in geothermal factory | Soil                       | D2216 modified marine broth (This medium was modified by using 5 g tryptone instead of peptone, omitting the addition of potassium bromide, and adjusting the pH to 5.2 with HCl) | F. an | 40–65°C | 60°C    | 5.0–9.5  | 7.0–8.0  | 7.2 Mb      | 46.80% | JYCG00000000 |
| Mittal et al. [108]           | <i>A. mongoliensis</i> MB4    | Surguja, Chhattisgarh, India   | Hot spring                 | Water                      | Nutrient agar medium                                                                                                                                                              | -     | -       | -       | -        | -        | 30,188.3 bp | 58.3%  | MRZM01000000 |
| Acer et al. [82]              | <i>Anoxybacillus</i> sp. AH1  | Ağrı, Turkey                   | Hot spring                 | Water                      | Nutrient broth                                                                                                                                                                    | A     | 40–70°C | 55–60°C | 6.0–11.0 | 9.0–10.0 | -           | -      | KU997674     |

|                                |                                      |                           |                            |                             |                                                                                        |       |         |         |          |         |              |        |                  |
|--------------------------------|--------------------------------------|---------------------------|----------------------------|-----------------------------|----------------------------------------------------------------------------------------|-------|---------|---------|----------|---------|--------------|--------|------------------|
| Chan et al. [77]               | <i>Anoxybacillus</i> sp. DT3-1       | Dusun Tua, Malaysia       | Hot spring                 | Water                       | Modified <i>Thermus</i> medium                                                         | A/An  | 30–65°C | 55°C    | 6.0–10.0 | 7.0     | -            | 41.80% | GU129931         |
| Al-Kahem Al-Balawi et al. [83] | <i>Anoxybacillus</i> sp. UARK-01     | Arkansas, USA             | Soil beneath grass         | Soil                        | Media containing mineral salts and 0.5% (w/v) switchgrass as the sole carbon source    | A     | 50–60°C | 55°C    | 7.0–9.0  | 8.0     | 3,669,492 bp | 42.60% | PRJNA379989      |
| Yadav et al. [118]             | <i>A. kamchatkensis</i> NASTPD13     | Myagdi, Nepal             | Hot spring                 | Water                       | Minimal salt medium (MSM)                                                              | F. an | 37–75°C | -       | 5.0–11.0 | -       | -            | -      | KY373247         |
| Khan et al. [103]              | <i>A. sediminis</i> YIM 73012        | Tibet, China              | Qucai geothermal field     | Sediment in geothermal site | R2A agar medium                                                                        | A     | 37–65°C | 45–50°C | 6.0–8.5  | 7.0–7.5 | -            | 43.60% | MG661737         |
| Matpan-Bekler et al. [107]     | <i>Anoxybacillus</i> sp. FMB1        | Yozgat, Turkey            | Hot spring                 | Water                       | Modified liquid <i>Thermus</i> medium                                                  | A     | 25–40°C | 50°C    | 4.0–11.0 | 7.0     | -            | -      | KP992869         |
| Reis et al. [113]              | <i>A. sp.</i> PC2                    | Caatinga, Brazil          | Caatinga                   | Soil                        | Enrichment culture medium                                                              | F. an | 50–60°C | 50–60°C | 5.0–10.0 | 7.0     | -            | -      | MN937679         |
| Cheng et al. [89]              | <i>A. caldiproteolyticus</i> 1A02591 | East of the Pacific Ocean | Deep sea hydrothermal vent | Sediment                    | 2216E medium (0.5% Bacto peptone, 0.1% yeast extract, and artificial seawater; pH 7.5) | A     | 45–65°C | 55°C    | -        | -       | -            | -      | JAEILW0000000000 |

\* **A = Aerobe; An = Anaerobe; F. a = Facultative aerobe; F. an = Facultative anaerobe**

**Table S3. Metagenomic data on *Anoxybacillus*, retrieved from public databases**

| Reference            | Species                                             | Location                                            | Source           | Substrate      |
|----------------------|-----------------------------------------------------|-----------------------------------------------------|------------------|----------------|
| Khanna et al. [104]  | <i>Anoxybacillus</i> sp.                            | -                                                   | Rat              | Fecal samples  |
| Najar et al. [109]   | <i>A. gonensis</i> and <i>A. caldiproteolyticus</i> | Borong and Polok hot springs of South Sikkim, India | Hot springs      | Water and soil |
| Ottesen et al. [111] | <i>Anoxybacillus</i> sp.                            | USA                                                 | Ice cream scoops | Ice cream      |

|                         |                          |                                             |                                         |                                                    |
|-------------------------|--------------------------|---------------------------------------------|-----------------------------------------|----------------------------------------------------|
| Sahm et al. [114]       | <i>Anoxybacillus</i> sp. | Furnas Valley, Sao Miguel, Azores, Portugal | Hot spring                              | Sediment, biofilm, and water                       |
| Salam and Obayori [115] | <i>Anoxybacillus</i> sp. | Ilorin, Kwara State, Nigeria                | Composite animal charcoal-polluted soil | Soil                                               |
| Wu et al. [116]         | <i>Anoxybacillus</i> sp. | Yangtze River, China                        | River and fish                          | Sediment, fish intestinal content, and fish mucosa |
| Zhao et al. [122]       | <i>A. flavithermus</i>   | Xiamen, China                               | Hot spring                              | Sediment                                           |

**Table S4. Regions of phages in the Antarctic *Anoxybacillus flavithermus* strains isolated in the present study, as predicted using PHASTER**

| Genomes       | Region                                                 | Region Length | Completeness | Score | Total Proteins | Region Position | Most common phage                     | G + C content |
|---------------|--------------------------------------------------------|---------------|--------------|-------|----------------|-----------------|---------------------------------------|---------------|
| <b>LAT_11</b> | 1 -<br>NODE_1_length_418483_cov_331812911              | 24.4 Kb       | Incomplete   | 40    | 17             | 11894–36301     | PHAGE_Bacill_phiNIT1_NC_021856(2)     | 39.69%        |
|               | 2 -<br>NODE_2_length_445795_cov_336731076              | 24.4 Kb       | Incomplete   | 40    | 17             | 11894–36301     | PHAGE_Staphy_SPbeta_like_NC_029119(2) | 39.69%        |
| <b>LAT_26</b> | 1 - 04-<br>edena/D136_FSP192285480-1a_HWNCGDSXX_L2__30 | 5.3 Kb        | Incomplete   | 20    | 9              | 3–5358          | PHAGE_Strept_Dp_1_NC_015274(2)        | 42.38%        |
|               | 2 -<br>NODE_18_length_49609_cov_303747719              | 33.6 Kb       | Intact       | 140   | 50             | 15746–49378     | PHAGE_Thermu_OH2_NC_021784(26)        | 41.44%        |

|               |                                                                                       |         |            |     |    |               |                                       |        |
|---------------|---------------------------------------------------------------------------------------|---------|------------|-----|----|---------------|---------------------------------------|--------|
|               | 3 -<br>NODE_1_length_650285_cov_263<br>.707080                                        | 24.3 Kb | Incomplete | 40  | 17 | 614060–638453 | PHAGE_Bacill_phiNIT1_NC_021856(2)     | 39.68% |
|               | 4 -<br>NODE_4_length_130475_cov_266<br>.489065                                        | 43.7 Kb | Intact     | 130 | 55 | 350–44128     | PHAGE_Thermu_OH2_NC_021784(12)        | 41.32% |
|               | 5 -<br>NODE_1_length_649997_cov_270<br>.183562                                        | 24.3 Kb | Incomplete | 40  | 17 | 613772–638165 | PHAGE_Bacill_phiNIT1_NC_021856(2)     | 39.68% |
| <b>LAT_27</b> | 1 -<br>NODE_1_length_456493_cov_294<br>.959721                                        | 24.4 Kb | Incomplete | 40  | 17 | 11898–36305   | PHAGE_Staphy_SPbeta_like_NC_029119(2) | 39.69% |
| <b>LAT_31</b> | 1 -<br>NODE_1_length_457267_cov_52.<br>1925_component_0                               | 24.3 Kb | Incomplete | 40  | 17 | 420909–445302 | PHAGE_Staphy_SPbeta_like_NC_029119(2) | 39.68% |
|               | 2 -<br>NODE_10_length_95172_cov_50.<br>4712_component_0                               | 4.8 Kb  | Incomplete | 20  | 9  | 2–4805        | PHAGE_Bacill_BCD7_NC_019515(2)        | 42.61% |
| <b>LAT_33</b> | 1 -<br>NODE_1_length_457267_cov_52.<br>1925_component_0                               | 5.1 Kb  | Incomplete | 20  | 9  | 89034–94170   | PHAGE_Bacill_BCD7_NC_019515(2)        | 42.52% |
|               | 2 - 04-<br>edena/D144_FSP192285488-<br>1a_HWNCGDSXX_L3__12,size=1<br>20848,cov=496.29 | 24.4 Kb | Incomplete | 40  | 17 | 12519–36926   | PHAGE_Staphy_SPbeta_like_NC_029119(2) | 39.69% |
| <b>LAT_35</b> | 1 - 04-<br>edena/D146_FSP192285490-<br>1a_HWNCGDSXX_L3__1,size=12<br>0698,cov=597.479 | 24.4 Kb | Incomplete | 40  | 17 | 12369–36776   | PHAGE_Bacill_phiNIT1_NC_021856(2)     | 39.69% |
|               | 2 - 04-<br>edena/D146_FSP192285490-<br>1a_HWNCGDSXX_L3__37,size=1<br>8327,cov=588.787 | 5.1 Kb  | Incomplete | 20  | 9  | 3–5139        | PHAGE_Bacill_BCD7_NC_019515(2)        | 42.52% |



|               |                                                            |         |            |     |    |             |                                           |        |
|---------------|------------------------------------------------------------|---------|------------|-----|----|-------------|-------------------------------------------|--------|
| <b>LAT_38</b> | 1 - 04-<br>edena/D149_FDMS192285493-<br>1a_HWNCGDSXX_L3__1 | 5.6 Kb  | Incomplete | 20  | 9  | 1-5698      | PHAGE_Strept_Dp_1_NC_015274(2)            | 42.01% |
|               | 2 -<br>NODE_18_length_49621_cov_333<br>.261575             | 33.6 Kb | Intact     | 140 | 50 | 15752-49384 | PHAGE_Thermu_OH2_NC_021784(26)            | 41.44% |
|               | 3 -<br>NODE_1_length_501254_cov_426<br>.879991             | 24.4 Kb | Incomplete | 40  | 17 | 11825-36232 | PHAGE_Staphy_SPbeta_like_NC_029119(<br>2) | 39.69% |
|               | 4 -<br>NODE_2_length_272886_cov_474<br>.757143             | 43.7 Kb | Intact     | 150 | 59 | 356-44134   | PHAGE_Geobac_E2_NC_009552(13)             | 41.33% |
|               | 5 -<br>NODE_17_length_49621_cov_333<br>.261575             | 33.6 Kb | Intact     | 140 | 50 | 15752-49384 | PHAGE_Thermu_OH2_NC_021784(26)            | 41.44% |

**Table S5. Genes related to the lifestyle of *Anoxybacillus flavithermus* strains and their corresponding locus tag, annotated with GO FEAT**

|         | Genes/Locus tag (when present) |                 |                 |                 |      |                 |                                    |      |                 |       |       |                 |                                    |                                  |      |                                                                          |                 |                                    |                                                                                             |                 |                                                                                                                                                                                             |                 |                                                                                                                                                                                             |
|---------|--------------------------------|-----------------|-----------------|-----------------|------|-----------------|------------------------------------|------|-----------------|-------|-------|-----------------|------------------------------------|----------------------------------|------|--------------------------------------------------------------------------|-----------------|------------------------------------|---------------------------------------------------------------------------------------------|-----------------|---------------------------------------------------------------------------------------------------------------------------------------------------------------------------------------------|-----------------|---------------------------------------------------------------------------------------------------------------------------------------------------------------------------------------------|
| Genomes | DnaK                           | DnaJ            | GrpE            | Hsp20           | hcrA | ClpC            | ClpP                               | yfjT | htpX            | GroEL | GroES | CspB            | CspD                               | Na+/H+ antiporter subunits A–G   | nhaC | UvrA                                                                     | UvrB            | UVRc                               | MutS                                                                                        | MutL            | LigA                                                                                                                                                                                        | RecR            | RuV                                                                                                                                                                                         |
| LAT_11  | N_01457                        | NFPJC LFB_01458 | NFPJ CLFB_01456 | NFPJC LFB_02018 | -    | NFPJ CLFB_00547 | NFPJC LFB_00387<br>NFPJC LFB_02866 | -    | NFPJC LFB_00200 | -     | -     | NFPJCL FB_00102 | NFPJ CLFB_00325<br>NFPJ CLFB_01003 | NFPJCLFB_01143<br>NFPJCLFB_01144 | -    | NFPJC LFB_02465<br>NFPJC LFB_02841<br>NFPJC LFB_02842<br>NFPJC LFB_03122 | NFPJC LFB_02841 | NFPJC LFB_02465<br>NFPJC LFB_03122 | NFPJC LFB_00065<br>NFPJC LFB_02481<br>NFPJC LFB_02483<br>NFPJC LFB_03138<br>NFPJC LFB_03140 | NFPJC LFB_00066 | NFPJCL FB_00002<br>NFPJCL FB_00070<br>NFPJCL FB_00073<br>NFPJCL FB_00080<br>NFPJCL FB_00183<br>NFPJCL FB_00427<br>NFPJCL FB_00428<br>NFPJCL FB_00478<br>NFPJCL FB_00540<br>NFPJCL FB_00542* | NFPJC LFB_00998 | NFPJC LFB_00017<br>NFPJC LFB_00018<br>NFPJC LFB_00113<br>NFPJC LFB_00758<br>NFPJC LFB_00783<br>NFPJC LFB_00996<br>NFPJC LFB_01048<br>NFPJC LFB_01121<br>NFPJC LFB_01150<br>NFPJC LFB_01151* |

|               |                                                  |                                          |                                                  |                                                                |   |                        |                                          |   |                    |   |   |                                          |                                                 |                                                                                      |   |                                                                                                            |                                                                |                                          |                                                                                                            |                    |                                                                                                                                                                                                                           |                                   |                                                                                                                             |
|---------------|--------------------------------------------------|------------------------------------------|--------------------------------------------------|----------------------------------------------------------------|---|------------------------|------------------------------------------|---|--------------------|---|---|------------------------------------------|-------------------------------------------------|--------------------------------------------------------------------------------------|---|------------------------------------------------------------------------------------------------------------|----------------------------------------------------------------|------------------------------------------|------------------------------------------------------------------------------------------------------------|--------------------|---------------------------------------------------------------------------------------------------------------------------------------------------------------------------------------------------------------------------|-----------------------------------|-----------------------------------------------------------------------------------------------------------------------------|
| <b>LAT_26</b> | MKDE<br>MENN_0204<br>7<br>MKDE<br>MENN_0340<br>6 | MKDE<br>MENN_02046<br>MKDE<br>MENN_03405 | MKD<br>EMEN<br>N_02048<br>MKD<br>EMEN<br>N_03407 | MKDE<br>MENN_00384<br>MKDE<br>MENN_01353                       | - | ILCL<br>CDJK_00598     | MKDE<br>MENN_02382                       | - | MKDE<br>MENN_01271 | - | - | MKDE<br>MENN_00017                       | MKD<br>EME<br>NN_0238<br>MKD<br>EME<br>NN_01105 | MKDEME<br>NN_00867<br>MKDEME<br>NN_00868<br>MKDEME<br>NN_03677<br>MKDEME<br>NN_03678 | - | MKDE<br>MENN_00360<br>MKDE<br>MENN_02101<br>MKDE<br>MENN_02406<br>MKDE<br>MENN_02407<br>MKDE<br>MENN_03460 | MKDE<br>MENN_02407                                             | MKDE<br>MENN_02101<br>MKDE<br>MENN_03460 | MKDE<br>MENN_00054<br>MKDE<br>MENN_02083<br>MKDE<br>MENN_02085<br>MKDE<br>MENN_03442<br>MKDE<br>MENN_03444 | MKDE<br>MENN_00053 | MKDEM<br>ENN_00039<br>MKDEM<br>ENN_00046<br>MKDEM<br>ENN_00049<br>MKDEM<br>ENN_00116<br>MKDEM<br>ENN_00408<br>MKDEM<br>ENN_00409<br>MKDEM<br>ENN_00459<br>MKDEM<br>ENN_00521<br>MKDEM<br>ENN_00523<br>MKDEM<br>ENN_00576* | MKDE<br>FPJCL<br>FBME<br>NN_01059 | MKDE<br>MENN_01059                                                                                                          |
| <b>LAT_27</b> | AOKP<br>IELD_02683                               | AOKP<br>IELD_02682                       | AOKP<br>IELD_02684                               | AOKPI<br>ELD_00070<br>AOKPI<br>ELD_00493<br>AOKPI<br>ELD_02246 | - | AOK<br>PIEL<br>D_02402 | AOKP<br>IELD_01161<br>AOKP<br>IELD_02018 | - | AOKP<br>IELD_00838 | - | - | AOKPI<br>ELD_00017<br>AOKPI<br>ELD_00630 | AOKP<br>IELD_000321<br>AOKP<br>IELD_001299      | AOKPIELD<br>_00805<br>AOKPIELD<br>_00806                                             | - | AOKPI<br>ELD_02042<br>AOKPI<br>ELD_02043<br>AOKPI<br>ELD_02926                                             | AOKP<br>IELD_02042<br>AOKP<br>IELD_02043<br>AOKP<br>IELD_02926 | AOKP<br>IELD_02926                       | AOKP<br>IELD_00667<br>AOKP<br>IELD_02942<br>AOKP<br>IELD_02944                                             | AOKP<br>IELD_00666 | AOKPIE<br>LD_00039<br>AOKPIE<br>LD_00046<br>AOKPIE<br>LD_00049<br>AOKPIE<br>LD_00079<br>AOKPIE<br>LD_00082<br>AOKPIE<br>LD_0010                                                                                           | AOKP<br>IELD_00183                | AOKP<br>IELD_00006<br>AOKP<br>IELD_00181<br>AOKP<br>IELD_00270<br>AOKP<br>IELD_00619<br>AOKP<br>IELD_00714<br>AOKP<br>IELD_ |

|        |                        |                        |                             |                                                  |   |                             |                                                  |   |                        |   |                        |                        |                                                            |                                          |   |                                                                            |                        |                        |                                                                            |                        |                                                                                                            |                                                                                                                                                                                                                                                                    |                                                                                                                                                                                                                                                                   |
|--------|------------------------|------------------------|-----------------------------|--------------------------------------------------|---|-----------------------------|--------------------------------------------------|---|------------------------|---|------------------------|------------------------|------------------------------------------------------------|------------------------------------------|---|----------------------------------------------------------------------------|------------------------|------------------------|----------------------------------------------------------------------------|------------------------|------------------------------------------------------------------------------------------------------------|--------------------------------------------------------------------------------------------------------------------------------------------------------------------------------------------------------------------------------------------------------------------|-------------------------------------------------------------------------------------------------------------------------------------------------------------------------------------------------------------------------------------------------------------------|
|        |                        |                        |                             |                                                  |   |                             |                                                  |   |                        |   |                        |                        |                                                            |                                          |   |                                                                            |                        |                        |                                                                            |                        | 9<br>AOKPIE<br>LD_0011<br>6<br>AOKPIE<br>LD_0011<br>7<br>AOKPIE<br>LD_0017<br>6<br>AOKPIE<br>LD_0022<br>3* |                                                                                                                                                                                                                                                                    | 00715<br>AOKP<br>IELD_<br>00730<br>AOKP<br>IELD_<br>00752<br>AOKP<br>IELD_<br>00753<br>AOKP<br>IELD_<br>00754*                                                                                                                                                    |
| LAT_31 | INBD<br>BCKJ_<br>00691 | INBDB<br>CKJ_0<br>0690 | INBD<br>BCKJ_<br>_0069<br>2 | INBDB<br>CKJ_00<br>748<br>INBDB<br>CKJ_01<br>997 | - | INBD<br>BCKJ_<br>_0212<br>2 | INBD<br>BCKJ_<br>01132<br>INBD<br>BCKJ_<br>01424 | - | INBD<br>BCKJ_<br>01772 | - | INBDBC<br>KJ_0271<br>6 | INBDB<br>CKJ_01<br>253 | INBD<br>BCKJ_<br>_0107<br>4<br>INBD<br>BCKJ_<br>_0279<br>2 | INBDBCKJ<br>_01614<br>INBDBCKJ<br>_01615 | - | INBD<br>BCKJ_<br>00291<br>INBD<br>BCKJ_<br>01399<br>INBD<br>BCKJ_<br>01400 | INBD<br>BCKJ_<br>01399 | INBD<br>BCKJ_<br>00291 | INBD<br>BCKJ_<br>00273<br>INBD<br>BCKJ_<br>00275<br>INBD<br>BCKJ_<br>01216 | INBD<br>BCKJ_<br>01217 | INBD<br>BCKJ_<br>02724                                                                                     | INBDBC<br>KJ_0003<br>8<br>INBDBC<br>KJ_0008<br>5<br>INBDBC<br>KJ_0009<br>4<br>INBDBC<br>KJ_0010<br>9<br>INBDBC<br>KJ_0011<br>2<br>INBDBC<br>KJ_0012<br>5<br>INBDBC<br>KJ_0013<br>7<br>INBDBC<br>KJ_0014<br>2<br>INBDBC<br>KJ_0018<br>9<br>INBDBC<br>KJ_0024<br>2 * | INBD<br>BCKJ_<br>00035<br>INBD<br>BCKJ_<br>00074<br>INBD<br>BCKJ_<br>00168<br>INBD<br>BCKJ_<br>00374<br>INBD<br>BCKJ_<br>00375<br>INBD<br>BCKJ_<br>00559<br>INBD<br>BCKJ_<br>00672<br>INBD<br>BCKJ_<br>00988<br>INBD<br>BCKJ_<br>01169<br>INBD<br>BCKJ_<br>01264* |

|               |                    |                    |                        |                                          |   |                        |                                          |   |                    |   |                    |                    |                                                  |                                          |   |                                                                |                    |                    |                                                                |                    |                                                                                                                                                                                                                           |                    |                                                                                                                                                                                                                           |
|---------------|--------------------|--------------------|------------------------|------------------------------------------|---|------------------------|------------------------------------------|---|--------------------|---|--------------------|--------------------|--------------------------------------------------|------------------------------------------|---|----------------------------------------------------------------|--------------------|--------------------|----------------------------------------------------------------|--------------------|---------------------------------------------------------------------------------------------------------------------------------------------------------------------------------------------------------------------------|--------------------|---------------------------------------------------------------------------------------------------------------------------------------------------------------------------------------------------------------------------|
| <b>LAT_33</b> | ANMP<br>AFOB_02765 | ANMP<br>AFOB_02766 | ANM<br>PAFO<br>B_02764 | ANMP<br>AFOB_00546<br>ANMP<br>AFOB_02225 | - | ANM<br>PAFO<br>B_01441 | ANMP<br>AFOB_00745<br>ANMP<br>AFOB_01713 | - | ANMP<br>AFOB_00083 | - | ANMPA<br>FOB_02633 | ANMP<br>AFOB_00209 | ANM<br>PAFO<br>B_01771<br>ANM<br>PAFO<br>B_02683 | ANMPAFO<br>B_00165<br>ANMPAFO<br>B_00166 | - | ANMP<br>AFOB_00769<br>ANMP<br>AFOB_00770<br>ANMP<br>AFOB_00875 | ANMP<br>AFOB_00770 | ANMP<br>AFOB_00875 | ANMP<br>AFOB_00875                                             | ANMP<br>AFOB_00245 | ANMPA<br>FOB_00066<br>ANMPA<br>FOB_00189<br>ANMPA<br>FOB_00238<br>ANMPA<br>FOB_00241<br>ANMPA<br>FOB_00301<br>ANMPA<br>FOB_00526<br>ANMPA<br>FOB_00528<br>ANMPA<br>FOB_00535<br>ANMPA<br>FOB_00826<br>ANMPA<br>FOB_00827* | ANMP<br>AFOB_02641 | ANMP<br>AFOB_00112<br>ANMP<br>AFOB_00113<br>ANMP<br>AFOB_00114<br>ANMP<br>AFOB_00157<br>ANMP<br>AFOB_00158<br>ANMP<br>AFOB_00159<br>ANMP<br>AFOB_00198<br>ANMP<br>AFOB_00348<br>ANMP<br>AFOB_00687<br>ANMP<br>AFOB_00697* |
| <b>LAT_35</b> | LBOC<br>MBFH_01052 | LBOC<br>MBFH_01051 | LBOC<br>MBFH_01053     | LBOC<br>MBFH_02160                       | - | LBOC<br>MBF<br>H_02066 | LBOC<br>MBFH_00213<br>LBOC<br>MBFH_01797 | - | LBOC<br>MBFH_00778 | - | LBOCM<br>BFH_02607 | LBOC<br>MBFH_01380 | LBOC<br>MBF<br>H_01281<br>LBOC<br>MBF<br>H_02513 | LBOCMBF<br>H_02326<br>LBOCMBF<br>H_02327 | - | LBOC<br>MBFH_00237<br>LBOC<br>MBFH_00238<br>LBOC<br>MBFH_01637 | LBOC<br>MBFH_00238 | LBOC<br>MBFH_01637 | LBOC<br>MBFH_00297<br>LBOC<br>MBFH_00299<br>LBOC<br>MBFH_02092 | LBOC<br>MBFH_02091 | LBOCM<br>BFH_00076<br>LBOCM<br>BFH_00089<br>LBOCM<br>BFH_00090<br>LBOCM<br>BFH_00295<br>LBOCM<br>BFH_00311<br>LBOCM                                                                                                       | LBOC<br>MBFH_02494 | LBOC<br>MBFH_00107<br>LBOC<br>MBFH_00108<br>LBOC<br>MBFH_00155<br>LBOC<br>MBFH_00165<br>LBOC<br>MBFH_00394<br>LBOC                                                                                                        |

|        |                        |                        |                            |                                                  |   |                            |                        |   |                        |   |   |                        |                                                          |                                          |   |                                                                                                      |                        |                        |                                                                            |                                                                                                                        |                                                                                                                                                                                                                                                                   |                                                                                                         |                                                                                                                                                                                                                                                                   |
|--------|------------------------|------------------------|----------------------------|--------------------------------------------------|---|----------------------------|------------------------|---|------------------------|---|---|------------------------|----------------------------------------------------------|------------------------------------------|---|------------------------------------------------------------------------------------------------------|------------------------|------------------------|----------------------------------------------------------------------------|------------------------------------------------------------------------------------------------------------------------|-------------------------------------------------------------------------------------------------------------------------------------------------------------------------------------------------------------------------------------------------------------------|---------------------------------------------------------------------------------------------------------|-------------------------------------------------------------------------------------------------------------------------------------------------------------------------------------------------------------------------------------------------------------------|
|        |                        |                        |                            |                                                  |   |                            |                        |   |                        |   |   |                        |                                                          |                                          |   |                                                                                                      |                        |                        |                                                                            | BFH_00<br>319<br>LBOCM<br>BFH_00<br>320<br>LBOCM<br>BFH_00<br>373<br>LBOCM<br>BFH_00<br>420<br>LBOCM<br>BFH_00<br>425* |                                                                                                                                                                                                                                                                   | MBFH_00908<br>LBOC<br>MBFH_01033<br>LBOC<br>MBFH_01364<br>LBOC<br>MBFH_01369<br>LBOC<br>MBFH_01536<br>* |                                                                                                                                                                                                                                                                   |
| LAT_38 | ILCLC<br>DJK_0<br>1998 | ILCLC<br>DJK_0<br>1999 | ILCL<br>CDJK<br>_0199<br>7 | ILCLC<br>DJK_00<br>501<br>ILCLC<br>DJK_01<br>512 | - | ILCL<br>CDJK<br>_0059<br>8 | ILCLC<br>DJK_0<br>2415 | - | ILCLC<br>DJK_0<br>0589 | - | - | ILCLC<br>DJK_00<br>219 | ILCL<br>CDJK<br>_0035<br>5<br>ILCL<br>CDJK<br>_0128<br>3 | ILCLCDJK<br>_00027<br>ILCLCDJK<br>_00028 | - | ILCLC<br>DJK_0<br>0477<br>ILCLC<br>DJK_0<br>1944<br>ILCLC<br>DJK_0<br>2439<br>ILCLC<br>DJK_0<br>2440 | ILCLC<br>DJK_0<br>2440 | ILCLC<br>DJK_0<br>1944 | ILCLC<br>DJK_0<br>0256<br>ILCLC<br>DJK_0<br>1960<br>ILCLC<br>DJK_0<br>1962 | ILCLC<br>DJK_0<br>0255                                                                                                 | ILCLCD<br>JK_0000<br>4<br>ILCLCD<br>JK_0012<br>9<br>ILCLCD<br>JK_0013<br>5<br>ILCLCD<br>JK_0014<br>0<br>ILCLCD<br>JK_0014<br>2<br>ILCLCD<br>JK_0016<br>3<br>ILCLCD<br>JK_0018<br>3<br>ILCLCD<br>JK_0024<br>1<br>ILCLCD<br>JK_0024<br>8<br>ILCLCD<br>JK_0025<br>1* | ILCLC<br>DJK_0<br>1253                                                                                  | ILCLC<br>DJK_0<br>0005<br>ILCLC<br>DJK_0<br>0034<br>ILCLC<br>DJK_0<br>0035<br>ILCLC<br>DJK_0<br>0036<br>ILCLC<br>DJK_0<br>0079<br>ILCLC<br>DJK_0<br>0080<br>ILCLC<br>DJK_0<br>0081<br>ILCLC<br>DJK_0<br>0103<br>ILCLC<br>DJK_0<br>0145<br>ILCLC<br>DJK_0<br>0208* |

\*: More than 10 locus tags in the corresponding gene.

**Table S6. Methodologies applied in previous related phylogenetic studies**

| Phylogeny/<br>Phylogenomics                                     | Methodology                                     | Gene                                   | Reference                                                                                                                                                                                                                                                                                                |
|-----------------------------------------------------------------|-------------------------------------------------|----------------------------------------|----------------------------------------------------------------------------------------------------------------------------------------------------------------------------------------------------------------------------------------------------------------------------------------------------------|
| Phylogenetic analysis of 16S rRNA                               | Neighbor-joining method                         | 16S rRNA                               | Acer Ö, Bekler FM, Piriñcioğlu H, Güven RG, Güven K. Purification and characterization of thermostable and detergent-stable $\alpha$ -amylase from <i>Anoxybacillus</i> sp. AH1. Food Technol Biotechnol. <b>2016</b> , 54, 70-77. doi: 10.17133/ftb.54.01.16.4122. PMID: 27904395. PMCID: PMC5105632.   |
| Phylogenetic analysis of 16S rRNA                               | Neighbor-joining and maximum likelihood methods | 16S rRNA                               | Al-Kahem Al-Balawi TH, Wood AL, Solis A, Cooper T, Barabote RD. <i>Anoxybacillus</i> sp. strain UARK-01, a new thermophilic soil bacterium with hyperthermostable alkaline laccase activity. Curr Microbiol. <b>2017</b> , 74, 762-771. doi: 10.1007/s00284-017-1239-5. Epub 2017 Apr 8. PMID: 28389772. |
| Phylogenetic analysis of 16S rRNA                               | Maximum likelihood method                       | 16S rRNA                               | Atanassova M, Derekova A, Mandeva R, Sjöholm C, Kambourova M. <i>Anoxybacillus bogrovensis</i> sp. nov., a novel thermophilic bacterium isolated from a hot spring in Dolni Bogrov, Bulgaria. Int J Syst Evol Microbiol. <b>2008</b> 58, 2359-2362. doi: 10.1099/ij.s.0.65745-0. PMID: 18842856.         |
| Phylogenetic analysis of 16S rRNA                               | Neighbor-joining method                         | 16S rRNA                               | Matpan-Bekler F, Guven K. Isolation and production of thermostable $\alpha$ -amylase from thermophilic <i>Anoxybacillus</i> sp. KP1 from Diyadin hot spring in Ağrı, Turkey. Biologia. <b>2014</b> , 69, 419-427. doi: 10.2478/s11756-014-0343-2.                                                        |
| Phylogenetic analysis of 16S rRNA                               | Neighbor-joining method                         | 16S rRNA                               | Matpan-Bekler F, Yalaz S, Guven K. Molecular characterisation and numerical analysis of novel moderately thermophile <i>Anoxybacillus</i> sp. FMB1. Rom Biotechnol Lett. <b>2018</b> , 23, 13964-13975. doi: 10.26327/RBL2018.150.                                                                       |
| Phylogenetic analysis of 16S rRNA                               | Neighbor-joining method                         | 16S rRNA                               | Chai YY, Kahar UM, Md Salleh M, Md Illias R, Goh KM. Isolation and characterization of pullulan-degrading <i>Anoxybacillus</i> species isolated from Malaysian hot springs. Environ Technol. <b>2012</b> , 33, 1231-1238. doi: 10.1080/09593330.2011.618935. PMID: 22856294.                             |
| Phylogenetic analysis of DT-Bgl and other $\beta$ -glucosidases | Neighbor-joining method                         | DT-Bgl and other $\beta$ -glucosidases | Chan CS, Sin LL, Chan KG, Shamsir MS, Manan FA, Sani RK, Goh KM. Characterization of a glucose-tolerant $\beta$ -glucosidase from <i>Anoxybacillus</i> sp. DT3-1. Biotechnol Biofuels. <b>2016</b> , 9, 174. doi: 10.1186/s13068-016-0587-x. PMID: 27555880. PMCID: PMC4994278.                          |
| Phylogenetic analysis of 16S rRNA                               | Maximum likelihood method                       | 16S rRNA                               | Chen XG, Stabnikova O, Tay JH, Wang JY, Tay ST. Thermoactive extracellular proteases of <i>Geobacillus caldoproteolyticus</i> sp. nov., from sewage sludge. Extremophiles. <b>2004</b> , 8, 489-498. doi: 10.1007/s00792-004-0412-5. Epub 2004 Aug 21. PMID: 15322950.                                   |

|                                   |                                                 |          |                                                                                                                                                                                                                                                                                                                                                                                                                                                                                                                                                                                                                                                                                                                                                                                                                                      |
|-----------------------------------|-------------------------------------------------|----------|--------------------------------------------------------------------------------------------------------------------------------------------------------------------------------------------------------------------------------------------------------------------------------------------------------------------------------------------------------------------------------------------------------------------------------------------------------------------------------------------------------------------------------------------------------------------------------------------------------------------------------------------------------------------------------------------------------------------------------------------------------------------------------------------------------------------------------------|
| Phylogenetic analysis of 16S rRNA | Neighbor-joining method                         | 16S rRNA | Chen J, Zheng J, Li Y, Hao HH, Chen JM. Characteristics of a novel thermophilic heterotrophic bacterium, <i>Anoxybacillus contaminans</i> HA, for nitrification-aerobic denitrification. Appl Microbiol Biotechnol. <b>2015</b> , 99, 10695-10702. doi: 10.1007/s00253-015-6870-0. Epub 2015 Aug 21. PMID: 26293335.                                                                                                                                                                                                                                                                                                                                                                                                                                                                                                                 |
| Phylogenetic analysis of 16S rRNA | Maximum likelihood method                       | 16S rRNA | Cihan AC, Ozcan B, Cokmus C. <i>Anoxybacillus salavatliensis</i> sp. nov., an $\alpha$ -glucosidase producing, thermophilic bacterium isolated from Salavatli, Turkey. J Basic Microbiol. <b>2011</b> , 51, 136-146. doi: 10.1002/jobm.201000115. Epub 2010 Nov 12. PMID: 21077116.                                                                                                                                                                                                                                                                                                                                                                                                                                                                                                                                                  |
| Phylogenetic analysis of 16S rRNA | Neighbor-joining method                         | 16S rRNA | Cihan AC, Cokmus C, Koc M, Ozcan B. <i>Anoxybacillus calidus</i> sp. nov., a thermophilic bacterium isolated from soil near a thermal power plant. Int J Syst Evol Microbiol. <b>2014</b> , 64, 211-219. doi: 10.1099/ij.s.0.056549-0. Epub 2013 Sep 19. Erratum in: Int J Syst Evol Microbiol. 2014 Aug;64(Pt 8):2926. Erratum in: Int J Syst Evol Microbiol. 2014 Jul;64(Pt 7):2508. PMID: 24052627.                                                                                                                                                                                                                                                                                                                                                                                                                               |
| Phylogenetic analysis of 16S rRNA | Maximum likelihood method                       | 16S rRNA | Coorevits A, Dinsdale AE, Halket G, Lebbe L, De Vos P, Van Landschoot A, Logan NA. Taxonomic revision of the genus <i>Geobacillus</i> : emendation of <i>Geobacillus</i> , <i>G. stearothermophilus</i> , <i>G. jurassicus</i> , <i>G. toebii</i> , <i>G. thermodenitrificans</i> and <i>G. thermoglucosidans</i> (nom. corrig., formerly ' <i>thermoglucosidasius</i> '); transfer of <i>Bacillus thermantarcticus</i> to the genus as <i>G. thermantarcticus</i> comb. nov.; proposal of <i>Caldibacillus debilis</i> gen. nov., comb. nov.; transfer of <i>G. tepidamans</i> to <i>Anoxybacillus</i> as <i>A. tepidamans</i> comb. nov.; and proposal of <i>Anoxybacillus caldiproteolyticus</i> sp. nov. Int J Syst Evol Microbiol. <b>2012</b> , 62, 1470-1485. doi: 10.1099/ij.s.0.030346-0. Epub 2011 Aug 19. PMID: 21856988. |
| Phylogenetic analysis of 16S rRNA | Neighbor-joining method                         | 16S rRNA | Deep K, Poddar A, Das SK. <i>Anoxybacillus suryakundensis</i> sp. nov, a moderately thermophilic, alkalitolerant bacterium isolated from hot spring at Jharkhand, India. PLoS One. <b>2013</b> 20;8(12):e85493. doi: 10.1371/journal.pone.0085493. PMID: 24376881. PMCID: PMC3869905.                                                                                                                                                                                                                                                                                                                                                                                                                                                                                                                                                |
| Phylogenetic analysis of 16S rRNA | Neighbor-joining and maximum likelihood methods | 16S rRNA | Derekova A, Sjøholm C, Mandeva R, Kambourova M. <i>Anoxybacillus rupiensis</i> sp. Nov., a novel thermophilic bacterium isolated from Rupi basin (Bulgaria). Extremophiles. <b>2007</b> , 11, 577-583. doi: 10.1007/s00792-007-0071-4. Epub 2007 May 16. PMID: 17505776.                                                                                                                                                                                                                                                                                                                                                                                                                                                                                                                                                             |
| Phylogenetic analysis of 16S rRNA | Neighbor-joining method                         | 16S rRNA | Dulger S, Demirbag Z, Belduz AO. <i>Anoxybacillus ayderensis</i> sp. nov. and <i>Anoxybacillus kestanbolensis</i> sp. nov. Int J Syst Evol Microbiol. <b>2004</b> , 54, 1499-1503. doi: 10.1099/ij.s.0.02863-0. PMID: 15388701.                                                                                                                                                                                                                                                                                                                                                                                                                                                                                                                                                                                                      |



|                                   |                         |          |                                                                                                                                                                                                                                                                                                                                                                                                                                                        |
|-----------------------------------|-------------------------|----------|--------------------------------------------------------------------------------------------------------------------------------------------------------------------------------------------------------------------------------------------------------------------------------------------------------------------------------------------------------------------------------------------------------------------------------------------------------|
| Phylogenetic analysis of 16S rRNA | Neighbor-joining method | 16S rRNA | Filippidou S, Jaussi M, Junier T, Wunderlin T, Jeanneret N, Palmieri F, Palmieri I, Roussel-Delif L, Vieth-Hillebrand A, Vetter A, Chain PS, Regenspurg S, Junier P. <i>Anoxybacillus geothermalis</i> sp. nov., a facultatively anaerobic, endospore-forming bacterium isolated from mineral deposits in a geothermal station. Int J Syst Evol Microbiol. <b>2016</b> , 66, 2944-2951. doi: 10.1099/ijsem.0.001125. Epub 2016 Apr 28. PMID: 27126386. |
| Phylogenetic analysis of 16S rRNA | Neighbor-joining method | 16S rRNA | Gao Y, Dai J, Peng H, Liu Y, Xu T. Isolation and characterization of a novel organic solvent-tolerant <i>Anoxybacillus</i> sp. PGDY12, a thermophilic gram-positive bacterium. J Appl Microbiol. <b>2011</b> , 110, 472-478. doi: 10.1111/j.1365-2672.2010.04903.x. Epub 2010 Dec 13. PMID: 21155953.                                                                                                                                                  |
| Phylogenetic analysis of 16S rRNA | Neighbor-joining method | 16S rRNA | Gul-Guven R, Guven K, Poli A, Nicolaus B. <i>Anoxybacillus kamchatkensis</i> subsp. <i>asaccharedens</i> subsp. nov., a thermophilic bacterium isolated from a hot spring in Batman. J Gen Appl Microbiol. <b>2008</b> , 54, 327-334. doi: 10.2323/jgam.54.327. PMID: 19164875.                                                                                                                                                                        |
| Phylogenetic analysis of 16S rRNA | Neighbor-joining method | 16S rRNA | Inan K, Belduz AO, Canakci S. <i>Anoxybacillus kaynarcensis</i> sp. nov., a moderately thermophilic, xylanase producing bacterium. J Basic Microbiol. <b>2013</b> , 53, 410-419. doi: 10.1002/jobm.201100638. Epub 2012 Jun 26. PMID: 22736500.                                                                                                                                                                                                        |
| Phylogenetic analysis of 16S rRNA | Neighbor-joining method | 16S rRNA | Kevbrin VV, Zengler K, Lysenko AM, Wiegel J. <i>Anoxybacillus kamchatkensis</i> sp. nov., a novel thermophilic facultative aerobic bacterium with a broad pH optimum from the Geyser valley, Kamchatka. Extremophiles. <b>2005</b> 9, 391-398. doi: 10.1007/s00792-005-0479-7. Epub 2005 Sep 3. PMID: 16142505.                                                                                                                                        |
| Phylogenetic analysis of 16S rRNA | Neighbor-joining method | 16S rRNA | Khan IU, Habib N, Xiao M, Devi AM, Habib M, Hejazi MS, Salam N, Zhi XY, Li WJ. <i>Anoxybacillus sediminis</i> sp. nov., a novel moderately thermophilic bacterium isolated from a hot spring. Antonie Van Leeuwenhoek. <b>2018</b> , 111, 2275-2282. doi: 10.1007/s10482-018-1118-5. Epub 2018 Jun 21. PMID: 29931494.                                                                                                                                 |
| Phylogenetic analysis of 16S rRNA | Neighbor-joining method | 16S rRNA | Namsaraev ZB, Babasanova OB, Dunaevsky YE, Akimov VN, Barkhutova DD, Gorlenko VM, Namsaraev BB. <i>Anoxybacillus mongoliensis</i> sp. nov., a novel thermophilic proteinase producing bacterium isolated from alkaline hot spring, Central Mongolia. Mikrobiologiya. <b>2010</b> 79, 516-523. PMID: 21058505.                                                                                                                                          |
| Phylogenetic analysis of 16S rRNA | Neighbor-joining method | 16S rRNA | Poli A, Esposito E, Lama L, Orlando P, Nicolaus G, de Appolonia F, Gambacorta A, Nicolaus B. <i>Anoxybacillus amylolyticus</i> sp. nov., a thermophilic amylase producing bacterium isolated from Mount Rittmann (Antarctica). Syst Appl Microbiol. <b>2006</b> , 29, 300-307. doi: 10.1016/j.syapm.2005.10.003. Epub 2005 Nov 3. PMID: 16682297.                                                                                                      |

|                                   |                                                                                                                   |          |                                                                                                                                                                                                                                                                                                                                                                                       |
|-----------------------------------|-------------------------------------------------------------------------------------------------------------------|----------|---------------------------------------------------------------------------------------------------------------------------------------------------------------------------------------------------------------------------------------------------------------------------------------------------------------------------------------------------------------------------------------|
| Phylogenetic analysis of 16S rRNA | Neighbor-joining method                                                                                           | 16S rRNA | Poli A, Romano I, Cordella P, Orlando P, Nicolaus B, Ceschi Berrini C. <i>Anoxybacillus thermarum</i> sp. nov., a novel thermophilic bacterium isolated from thermal mud in Euganean hot springs, Abano Terme, Italy. <i>Extremophiles</i> . <b>2009</b> , <i>13</i> , 867-874. doi: 10.1007/s00792-009-0274-y. Epub 2009 Aug 27. PMID: 19710998.                                     |
| Phylogenetic analysis of 16S rRNA | Determined by the neighbor-joining algorithm and evaluated by maximum likelihood and maximum parsimony algorithms | 16S rRNA | Xia W, Dong H, Zheng C, Cui Q, He P, Tang Y. Hydrocarbon degradation by a newly isolated thermophilic <i>Anoxybacillus</i> sp. with bioemulsifier production and new alkB genes. <i>RSC Adv</i> . <b>2015</b> , <i>5</i> , 102367-102377. doi: 10.1039/C5RA17137G.                                                                                                                    |
| Phylogenetic analysis of 16S rRNA | Maximum likelihood method                                                                                         | 16S rRNA | Yadav P, Maharjan J, Korpole S, Prasad GS, Sahni G, Bhattarai T, Sreerama L. Production, purification, and characterization of thermostable alkaline xylanase from <i>Anoxybacillus kamchatkensis</i> NASTPD13. <i>Front Bioeng Biotechnol</i> . <b>2018</b> , <i>6</i> :65. doi: 10.3389/fbioe.2018.00065                                                                            |
| Phylogenetic analysis of 16S rRNA | Neighbor-joining method                                                                                           | 16S rRNA | Yumoto I, Hirota K, Kawahara T, Nodasaka Y, Okuyama H, Matsuyama H, Yokota Y, Nakajima K, Hoshino T. <i>Anoxybacillus voinovskiensis</i> sp. nov., a moderately thermophilic bacterium from a hot spring in Kamchatka. <i>Int J Syst Evol Microbiol</i> . <b>2004</b> , <i>54</i> , 1239-1242. doi: 10.1099/ij.s.0.02889-0. PMID: 15280298.                                           |
| Phylogenetic analysis of 16S rRNA | Neighbor-joining method                                                                                           | 16S rRNA | Zhang CM, Huang XW, Pan WZ, Zhang J, Wei KB, Klenk HP, Tang SK, Li WJ, Zhang KQ. <i>Anoxybacillus tengchongensis</i> sp. nov. and <i>Anoxybacillus eryuanensis</i> sp. nov., facultatively anaerobic, alkalitolerant bacteria from hot springs. <i>Int J Syst Evol Microbiol</i> . <b>2011</b> , <i>61</i> , 118-122. doi: 10.1099/ij.s.0.020834-0. Epub 2010 Feb 19. PMID: 20173008. |
| Phylogenetic analysis of 16S rRNA | Neighbor-joining method                                                                                           | 16S rRNA | Zhang XQ, Zhang ZL, Wu N, Zhu XF, Wu M. <i>Anoxybacillus vitaminiphilus</i> sp. nov., a strictly aerobic and moderately thermophilic bacterium isolated from a hot spring. <i>Int J Syst Evol Microbiol</i> . <b>2013</b> , <i>63</i> , 4064-4071. doi: 10.1099/ij.s.0.050096-0. Epub 2013 May 31. PMID: 23728374.                                                                    |

**Table S7. Details of strains used in genomic analysis**

| <b>Name</b>                                   | <b>NCBI Ref Seq Assembly Accession</b> | <b>Status</b>   |
|-----------------------------------------------|----------------------------------------|-----------------|
| <i>Geobacillus kaustophilus</i> strain HTA426 | GCF_000009785.1                        | Complete genome |
| <i>Geobacillus genomo</i> sp. 3 JF8           | GCF_000445995.2                        | Complete genome |
| <i>Geobacillus</i> sp. 12AMOR1                | GCF_001028085.1                        | Complete genome |
| <i>Brevibacillus brevis</i> DZQ7              | GCF_001039275.2                        | Complete genome |
| <i>Brevibacillus brevis</i> NBRC 100599       | GCF_000010165.1                        | Complete genome |
| <i>Anoxybacillus amylolyticus</i> DSM 15939   | GCF_001634285.1                        | Complete genome |
| <i>Anoxybacillus</i> sp. B7M1                 | GCF_001634305.1                        | Complete genome |
| <i>Anoxybacillus flavithermus</i> WK1         | GCF_000019045.1                        | Complete genome |
